# Supplementary material for: Log Mean Divisia Index Decomposition Analysis of the Demand for Building Materials: Application to Concrete, Dwellings, and the U.K
Source: Environ Sci Technol. 2021 Feb 20;55(5):2767–78. doi: 10.1021/acs.est.0c02387 (PMC8023668; doi:10.1021/acs.est.0c02387)
Supplement: Supplementary file 2 — es0c02387_si_002.xlsx [file es0c02387_si_002.xlsx]

## Sheet: Outline
Log mean divisia index decomposition analysis of the demand for building materials: application to concrete, dwellings, and the UK
He He 1,2,a, Rupert J. Myers 1,2,b,*
1 Current address: Department of Civil and Environmental Engineering, Imperial College London, Skempton Building, London, SW7 2AZ, United Kingdom
2 School of Engineering, The University of Edinburgh, King’s Buildings, Sanderson Building, Edinburgh, EH9 3FB, United Kingdom
a h.he@imperical.ac.uk
b r.myers@imperial.ac.uk
* Corresponding author
Outline of Sheets
Data Sheet 1	The total amount of new dwelling stocks in England, Scotland, Wales, and Northern Ireland (DW)
Data Sheet 2	The fractions of dwelling types in England, Scotland, Wales, and Northern Ireland (DT)
Data Sheet 3	The total amount of each dwelling type in England, Scotland, Wales, and Northern Ireland (DWj)
Data Sheet 4	The average floor area of each dwelling type in England, Scotland, Wales, and Northern Ireland (FAS) (Fig. S1)
Data Sheet 5	The total floor area of each dwelling type in England, Scotland, Wales, and Northern Ireland (FA)
Data Sheet 6	The material intensity (concrete) in the UK (MI) (Fig. S4)
Data Sheet 7	The amount of concrete in each dwelling type (BMi)
Data Sheet 8	Population in England, Scotland, Wales, and Northern Ireland (P)
Data Sheet 9	The gross value added of the Construction sector (GVAC) in England, Scotland, Wales, and Northern Ireland
Data Sheet 10	The LMDI decomposition in England
Data Sheet 11	The LMDI decomposition in Scotland
Data Sheet 12	The LMDI decomposition in Wales
Data Sheet 13	The LMDI decomposition in Northern Ireland
Data Sheet 14	Socio-economic drivers of new dwelling construction in the UK from 1951 to 2014 (Fig. S2a)
Data Sheet 15	The populations of UK subregions from 1951 to 2014 (Fig. S2b)
Data Sheet 16	The deflated GVAC values of UK subregions from 1951 to 2014 (Fig. S2c)
Data Sheet 17	The number of dwellings constructed in UK subregions from 1951 to 2014 (Fig. S2d)
Data Sheet 18	Material intensity effect on demand for concrete in new dwellings in (a) the UK and (b) its four subregions from 1951 to 2014 (Fig. 2)
Data Sheet 19	Floor area shape effect on concrete change in the UK and its subregions during 1951–2014 (Fig. 3)
Data Sheet 20	Floor area shape effect to concrete change of seven types of new dwellings in England during 1951–2014 (Fig. S6)
Data Sheet 21	Dwelling type effect to concrete change in the UK and its subregions during 1951–2014 (Fig. 4)
Data Sheet 22	Dwelling type effect to concrete change of seven types of new dwellings in England during 1951–2014 (Fig. 5a)
Data Sheet 23	The proportion of the number of each type of new dwelling to the total number of new dwellings in England during 1951–2014 (Fig. 5b)
Data Sheet 24	Dwelling intensity effect to concrete change in the UK and its subregions during 1951–2014 (Fig. 6)
Data Sheet 25	Economic output effect to concrete change in the UK and its subregions during 1951–2014 (Fig.7)
Data Sheet 26	Population effect to concrete change in the UK and its subregions during 1951–2014 (Fig. 8)
Data Sheet 27	The overall contribution of different effects to concrete change in four regions during 1951–2014 (Fig. 9)
Data Sheet 28	The analysis of correlation between dwelling intensity effect and economic output effect (Table S3)
Data Sheet 29	The analysis for the number of new dwellings and the amount of new concrete demand
Data Sheet 30	The multiple relationships between the GVAc and the number of new dwellings (Fig. S7)
Data Sheet 31	The relation of the ‘density effect’ to house prices (Fig. S8)
Data Sheet 32	Inflows of concrete and floor area into the in-use stock (Fig. S3)

## Sheet: Data Sheet 1
Number of dwelling	England	Scotland	Wales	Northern Ireland		Source
1946	49250	4310	1840			https://www.gov.uk/government/statistical-data-sets/live-tables-on-house-building
1947	120860	12150	6680
1948	193590	21210	12790
1949	162110	25850	9670	7630	205260
1950	163340	25810	9020	7260
1951	162290	22930	9620	7030
1952	196930	30950	12050	8400
1953	263680	39550	15570	8030
1954	293110	38850	15840	6320
1955	270010	34070	13320	7030
1956	256100	31900	12630	7050
1957	256360	32440	12290	6500
1958	231150	32170	10380	4940
1959	238600	27290	10790	4890
1960	257620	28590	11600	6440
1961	256160	27230	12700	7100
1962	263560	26760	15110	8220
1963	256580	28220	14080	8840
1964	317540	37170	18970	9520
1965	327660	35120	19520	8940
1966	330120	36030	19360	10500
1967	342740	41460	20160	11100
1968	352540	41990	19180	12120
1969	306860	42630	17300	11530
1970	291790	43130	15470	11830
1971	294680	40780	15100	13920
1972	272520	31990	14770	11650
1973	249710	30030	14330	10560
1974	229360	28340	11860	10070
1975	261460	34320	17300	8920
1976	263430	36530	15300	9580
1977	261600	27320	14480	10760
1978	241360	25780	12710	8840
1979	209460	23780	11330	7250
1980	204370	20610	10570	6450
1981	170600	20010	9190	6830
1982	151630	16420	7770	7020
1983	173720	17930	7680	9700
1984	182080	18840	9030	10460
1985	170040	18410	8250	10770
1986	179140	18640	8570	10200
1987	189300	17710	9440	9800
1988	202930	18270	11230	9930
1989	179360	20190	11630	10280
1990	163900	20200	10470	7930
1991	154600	19340	10170	6910
1992	143830	17920	9660	7690
1993	147840	21250	9340	7230
1994	154640	21790	9610	6970
1995	157140	24540	9000	8440
1996	149090	21280	10110	8560
1997	149490	22560	8890	10170
1998	142650	20410	7890	10080
1999	141010	23480	8000	9500
2000	135100	21720	8620	11410
2001	129510	22400	8530	13650
2002	136800	23150	8160	13850
2003	144060	23660	8260	14510
2004	154070	24980	8890	15560
2005	159450	25300	7770	13220
2006	160850	25300	8720	14100
2007	176650	25750	9510	11680
2008	148010	22040	7470	9810
2009	124970	17650	6350	8170
2010	106720	16940	5610	6720
2011	114020	15280	5660	5750
2012	115590	15020	5430	5540
2013	109440	15130	5610	5410
2014	117810	15610	6180	5520
2015	142470	17230	6880	5410
2016	141280	16930	6620	6450
2017	163410	17590	6890	6880
2018	165210	20260	5820	7640

## Sheet: Data Sheet 2
The fractions of dwelling types in England for cohorts								Interpolated fractions of dwelling types in England for years									The fractions of dwelling types in Scotland for cohorts								Interpolated fractions of dwelling types in Scotland for years
								Year	End terrace	Mid terrace	Semi detached	Detached	Bungalow	Coverted flat	Purpose built flat										Year	End terrace	Mid terrace	Semi detached	Detached	Bungalow	Coverted flat	Purpose built flat
	1945-1964	1965-1974	1975-1980	1981-1990	1991-2002	Post 2002		1950	0.0911615	0.0959321	0.447769	0.0113202	0.157913	0.0175915	0.169842			1945-1964	1965-1974	1975-1980	1981-1990	1991-2002	Post 2002		1950	0.19748	0.199236	0.308358	0.00112932	0.151694	0.0157583	0.123552
End terrace	0.09	0.095	0.118785	0.0957633	0.12	0.145929		1951	0.0911761	0.0966901	0.434739	0.0239356	0.158367	0.0173471	0.169983		End terrace	0.168807	0.159223	0.159223	0.0634675	0.0634675	0.0634675		1951	0.194441	0.196124	0.302443	0.0149378	0.152924	0.0155951	0.120979
Mid terrace	0.0962924	0.11	0.117583	0.103004	0.099	0.103865		1952	0.09122	0.0974246	0.42197	0.0362426	0.158729	0.0171027	0.170236		Mid terrace	0.170642	0.159223	0.159223	0.0650155	0.0650155	0.0650155		1952	0.191423	0.193035	0.296619	0.0285073	0.154205	0.0154318	0.118453
Semi detached	0.4	0.22	0.135543	0.185393	0.146265	0.113091		1953	0.0912933	0.0981357	0.409464	0.0482412	0.159	0.0168584	0.170598		Semi detached	0.27156	0.213592	0.213592	0.122291	0.122291	0.122291		1953	0.188425	0.189968	0.290886	0.0418379	0.155538	0.0152685	0.115973
Detached	0.1	0.158421	0.216184	0.272442	0.355348	0.187182		1954	0.0913961	0.0988234	0.397218	0.0599312	0.159179	0.016614	0.171072		Detached	0.0770642	0.23301	0.23301	0.396285	0.396285	0.396285		1954	0.185447	0.186924	0.285244	0.0549294	0.156923	0.0151052	0.113539
bungalow	0.141586	0.208002	0.104564	0.109711	0.0798785	0.0312446		1955	0.0915283	0.0994877	0.385234	0.0713129	0.159267	0.0163696	0.171655		bungalow	0.185321	0.143689	0.143689	0.29257	0.29257	0.29257		1955	0.18249	0.183903	0.279692	0.067782	0.158359	0.0149419	0.111151
coverted flat	0.0183715	0.0126828	0.00733158	0.01	0.005	0.005		1956	0.0916899	0.100129	0.373512	0.0823861	0.159263	0.0161253	0.17235		coverted flat	0.0165138	0.0116505	0.0116505	0.00773994	0.00773994	0.00773994		1956	0.179552	0.180904	0.274231	0.0803957	0.159847	0.0147786	0.108811
purpose built flat	0.15	0.2	0.299263	0.223772	0.197681	0.410411		1957	0.0918809	0.100746	0.362051	0.0931508	0.159167	0.0158809	0.173155		purpose built flat	0.110092	0.0796117	0.0796117	0.0526316	0.0526316	0.0526316		1957	0.176634	0.177929	0.268861	0.0927703	0.161387	0.0146153	0.106516
								1958	0.0921014	0.10134	0.350851	0.103607	0.15898	0.0156365	0.17407										1958	0.173737	0.174976	0.263582	0.104906	0.162978	0.014452	0.104268
Source	https://www.gov.uk/government/statistics/english-housing-survey-2017-to-2018-headline-report							1959	0.0923512	0.10191	0.339914	0.113755	0.158701	0.0153922	0.175096		Source	https://www.gov.scot/publications/scottish-house-condition-survey-2017-key-findings/pages/4/							1959	0.17086	0.172045	0.258393	0.116803	0.16462	0.0142887	0.102066
								1960	0.0926305	0.102458	0.329237	0.123594	0.158331	0.0151478	0.176233										1960	0.168003	0.169138	0.253295	0.12846	0.166315	0.0141254	0.0999107
								1961	0.0929392	0.102981	0.318822	0.133125	0.157869	0.0149034	0.17748										1961	0.165166	0.166253	0.248288	0.139879	0.16806	0.0139621	0.0978017
								1962	0.0932773	0.103482	0.308669	0.142348	0.157316	0.0146591	0.178837										1962	0.162349	0.16339	0.243372	0.151059	0.169858	0.0137988	0.0957392
Assuption for Wales								1963	0.0936449	0.103958	0.298777	0.151262	0.156671	0.0144147	0.180305		Assuption for Northern Ireland								1963	0.159552	0.160551	0.238547	0.162	0.171707	0.0136355	0.093723
Wales has the fractions of dwelling types as England for years.								1964	0.0940419	0.104412	0.289146	0.159868	0.155935	0.0141703	0.181884		Northern Ireland has the fractions of dwelling types as England for years.								1964	0.156776	0.157734	0.233812	0.172702	0.173607	0.0134722	0.0917532
								1965	0.0944682	0.104842	0.279777	0.168165	0.155107	0.013926	0.183573										1965	0.154019	0.15494	0.229168	0.183165	0.175559	0.013309	0.0898298
								1966	0.094924	0.105248	0.27067	0.176153	0.154187	0.0136816	0.185373										1966	0.151283	0.152169	0.224615	0.193389	0.177563	0.0131457	0.0879528
								1967	0.0954093	0.105632	0.261824	0.183834	0.153176	0.0134372	0.187283										1967	0.148566	0.14942	0.220153	0.203373	0.179618	0.0129824	0.0861222
								1968	0.0959239	0.105991	0.253239	0.191206	0.152074	0.0131929	0.189304										1968	0.14587	0.146694	0.215781	0.213119	0.181725	0.0128191	0.084338
								1969	0.096468	0.106328	0.244916	0.198269	0.150879	0.0129485	0.191435										1969	0.143194	0.143991	0.2115	0.222626	0.183883	0.0126558	0.0826002
								1970	0.0970414	0.10664	0.236855	0.205024	0.149594	0.0127041	0.193677										1970	0.140539	0.141311	0.20731	0.231894	0.186093	0.0124925	0.0809087
								1971	0.0976443	0.10693	0.229055	0.21147	0.148216	0.0124598	0.196029										1971	0.137903	0.138653	0.203211	0.240923	0.188355	0.0123292	0.0792637
								1972	0.0982767	0.107196	0.221516	0.217608	0.146748	0.0122154	0.198492										1972	0.135287	0.136018	0.199203	0.249714	0.190668	0.0121659	0.0776651
								1973	0.0989384	0.107438	0.214239	0.223438	0.145187	0.011971	0.201065										1973	0.132692	0.133406	0.195285	0.258265	0.193033	0.0120026	0.0761129
								1974	0.0996296	0.107658	0.207223	0.228959	0.143535	0.0117267	0.203749										1974	0.130117	0.130816	0.191458	0.266577	0.195449	0.0118393	0.074607
								1975	0.10035	0.107853	0.200469	0.234172	0.141792	0.0114823	0.206544										1975	0.127561	0.128249	0.187722	0.27465	0.197917	0.011676	0.0731476
								1976	0.1011	0.108026	0.193977	0.239076	0.139957	0.0112379	0.209449										1976	0.125026	0.125705	0.184076	0.282484	0.200437	0.0115127	0.0717345
								1977	0.10188	0.108175	0.187746	0.243672	0.13803	0.0109936	0.212465										1977	0.122511	0.123184	0.180522	0.290079	0.203008	0.0113494	0.0703679
								1978	0.102688	0.1083	0.181776	0.247959	0.136012	0.0107492	0.215591										1978	0.120017	0.120685	0.177058	0.297436	0.20563	0.0111861	0.0690476
								1979	0.103527	0.108402	0.176068	0.251938	0.133903	0.0105048	0.218827										1979	0.117542	0.118209	0.173685	0.304553	0.208304	0.0110229	0.0677737
								1980	0.104394	0.108481	0.170621	0.255609	0.131701	0.0102605	0.222175										1980	0.115087	0.115756	0.170403	0.311431	0.21103	0.0108596	0.0665463
								1981	0.105291	0.108536	0.165436	0.258971	0.129409	0.0100161	0.225632										1981	0.112653	0.113325	0.167211	0.318071	0.213807	0.0106963	0.0653652
								1982	0.106218	0.108567	0.160512	0.262024	0.127024	0.00977172	0.2292										1982	0.110239	0.110917	0.16411	0.324471	0.216636	0.010533	0.0642305
								1983	0.107174	0.108576	0.15585	0.264769	0.124548	0.00952735	0.232879										1983	0.107844	0.108532	0.1611	0.330632	0.219517	0.0103697	0.0631422
								1984	0.108159	0.108561	0.15145	0.267206	0.121981	0.00928298	0.236669										1984	0.10547	0.10617	0.158181	0.336555	0.222449	0.0102064	0.0621003
								1985	0.109174	0.108522	0.14731	0.269334	0.119322	0.00903862	0.240568										1985	0.103117	0.10383	0.155353	0.342238	0.225433	0.0100431	0.0611048
								1986	0.110218	0.10846	0.143433	0.271154	0.116572	0.00879425	0.244579										1986	0.100783	0.101513	0.152615	0.347683	0.228468	0.0098798	0.0601557
								1987	0.111292	0.108375	0.139817	0.272665	0.11373	0.00854988	0.2487										1987	0.0984691	0.0992191	0.149968	0.352888	0.231555	0.00971651	0.059253
								1988	0.112395	0.108266	0.136462	0.273868	0.110796	0.00830552	0.252931										1988	0.0961756	0.0969476	0.147412	0.357855	0.234693	0.00955322	0.0583967
								1989	0.113527	0.108134	0.133369	0.274763	0.107771	0.00806115	0.257273										1989	0.0939022	0.0946989	0.144947	0.362582	0.237883	0.00938992	0.0575868
								1990	0.114689	0.107978	0.130537	0.275349	0.104654	0.00781678	0.261726										1990	0.0916489	0.0924728	0.142572	0.367071	0.241125	0.00922663	0.0568232
								1991	0.11588	0.107799	0.127967	0.275626	0.101446	0.00757242	0.266289										1991	0.0894158	0.0902695	0.140288	0.37132	0.244418	0.00906334	0.0561061
								1992	0.117101	0.107596	0.125658	0.275595	0.098146	0.00732805	0.270962										1992	0.0872028	0.0880889	0.138095	0.375331	0.247762	0.00890004	0.0554354
								1993	0.118351	0.10737	0.123611	0.275256	0.0947547	0.00708368	0.275747										1993	0.0850099	0.085931	0.135993	0.379103	0.251159	0.00873675	0.054811
								1994	0.119631	0.107121	0.121825	0.274608	0.0912718	0.00683931	0.280641										1994	0.0828372	0.0837958	0.133982	0.382635	0.254607	0.00857346	0.0542331
								1995	0.12094	0.106848	0.120301	0.273652	0.0876973	0.00659495	0.285646										1995	0.0806845	0.0816834	0.132061	0.385929	0.258106	0.00841017	0.0537015
								1996	0.122278	0.106552	0.119038	0.272387	0.0840313	0.00635058	0.290762										1996	0.078552	0.0795936	0.130231	0.388984	0.261657	0.00824687	0.0532164
								1997	0.123646	0.106232	0.118037	0.270814	0.0802738	0.00610621	0.295989										1997	0.0764397	0.0775266	0.128492	0.3918	0.26526	0.00808358	0.0527776
								1998	0.125043	0.105889	0.117297	0.268933	0.0764247	0.00586185	0.301325										1998	0.0743474	0.0754823	0.126843	0.394377	0.268914	0.00792029	0.0523852
								1999	0.12647	0.105523	0.116818	0.266743	0.072484	0.00561748	0.306773										1999	0.0722753	0.0734608	0.125286	0.396714	0.27262	0.007757	0.0520393
								2000	0.127926	0.105133	0.116602	0.264244	0.0684518	0.00537311	0.312331										2000	0.0702234	0.0714619	0.123819	0.398813	0.276377	0.0075937	0.0517397
								2001	0.129412	0.104719	0.116646	0.261437	0.0643281	0.00512875	0.317999										2001	0.0681915	0.0694858	0.122443	0.400673	0.280186	0.00743041	0.0514865
								2002	0.130926	0.104283	0.116952	0.258322	0.0601128	0.00488438	0.323778										2002	0.0661798	0.0675324	0.121158	0.402294	0.284046	0.00726712	0.0512797
								2003	0.132471	0.103822	0.11752	0.254898	0.0558059	0.00464001	0.329667										2003	0.0641882	0.0656017	0.119963	0.403676	0.287958	0.00710382	0.0511193
								2004	0.134044	0.103339	0.118349	0.251166	0.0514075	0.00439565	0.335667										2004	0.0622167	0.0636937	0.118859	0.404819	0.291922	0.00694053	0.0510053
								2005	0.135648	0.102832	0.11944	0.247125	0.0469176	0.00415128	0.341778										2005	0.0602654	0.0618084	0.117846	0.405723	0.295937	0.00677724	0.0509377
								2006	0.13728	0.102301	0.120792	0.242776	0.0423361	0.00390691	0.347999										2006	0.0583342	0.0599459	0.116924	0.406388	0.300004	0.00661395	0.0509165
								2007	0.138942	0.101747	0.122406	0.238118	0.037663	0.00366255	0.354331										2007	0.0564231	0.0581061	0.116093	0.406814	0.304122	0.00645065	0.0509417
								2008	0.140634	0.10117	0.124281	0.233152	0.0328984	0.00341818	0.360773										2008	0.0545322	0.056289	0.115352	0.407001	0.308292	0.00628736	0.0510133
								2009	0.142355	0.100569	0.126417	0.227878	0.0280423	0.00317381	0.367326										2009	0.0526613	0.0544946	0.114702	0.406949	0.312514	0.00612407	0.0511312
								2010	0.144105	0.0999449	0.128815	0.222295	0.0230946	0.00292944	0.373989										2010	0.0508106	0.052723	0.114143	0.406659	0.316787	0.00596077	0.0512956
								2011	0.145884	0.0992972	0.131475	0.216404	0.0180553	0.00268508	0.380763										2011	0.0489801	0.0509741	0.113675	0.406129	0.321112	0.00579748	0.0515064
								2012	0.147694	0.0986262	0.134396	0.210204	0.0129245	0.00244071	0.387647										2012	0.0471696	0.0492478	0.113297	0.40536	0.325488	0.00563419	0.0517635
								2013	0.149532	0.0979317	0.137579	0.203695	0.00770219	0.00219634	0.394642										2013	0.0453793	0.0475444	0.11301	0.404352	0.329916	0.0054709	0.0520671
								2014	0.1514	0.0972137	0.141023	0.196879	0.0023883	0.00195198	0.401747										2014	0.0436092	0.0458636	0.112814	0.403105	0.334395	0.0053076	0.052417

## Sheet: Data Sheet 3
Year	End terrace (ENDW)	Mid terrace (ENDW)	Semi detached (ENDW)	Detached (ENDW)	Bungalow (ENDW)	Coverted flat (ENDW)	Purpose built flat (ENDW)		Year	End terrace (SCDW)	Mid terrace (SCDW)	Semi detached (SCDW)	Detached (SCDW)	Bungalow (SCDW)	Coverted flat (SCDW)	Purpose built flat (SCDW)		Year	End terrace (WADW)	Mid terrace (WADW)	Semi detached (WADW)	Detached (WADW)	Bungalow (WADW)	Coverted flat (WADW)	Purpose built flat (WADW)		Year	End terrace (NIDW)	Mid terrace (NIDW)	Semi detached (NIDW)	Detached (NIDW)	Bungalow (NIDW)	Coverted flat (NIDW)	Purpose built flat (NIDW)
1950	14890.3	15669.6	73138.5	1849.04	25793.6	2873.39	27742		1950	5096.95	5142.29	7958.71	29.1477	3915.21	406.723	3188.88		1950	822.277	865.308	4038.87	102.108	1424.38	158.675	1531.97		1950	1433.7	1446.46	2238.68	8.19886	1101.3	114.406	896.989
1951	14797	15691.8	70553.8	3884.52	25701.4	2815.26	27586.6		1951	4458.54	4497.13	6935.02	342.524	3506.54	357.595	2774.05		1951	877.114	930.159	4182.19	230.261	1523.49	166.879	1635.24		1951	1366.92	1378.75	2126.17	105.013	1075.05	109.633	850.484
1952	17964	19185.8	83098.6	7137.26	31258.6	3368.04	33524.5		1952	5924.55	5974.43	9180.36	882.302	4772.65	477.613	3666.11		1952	1099.2	1173.97	5084.74	436.724	1912.69	206.088	2051.34		1952	1607.96	1621.49	2491.6	239.462	1295.32	129.627	995.003
1953	24072.2	25876.4	107967	12720.2	41925.1	4445.21	44983.4		1953	7452.22	7513.24	11504.5	1654.69	6151.54	603.868	4586.72		1953	1421.44	1527.97	6375.35	751.115	2475.63	262.485	2656.22		1953	1513.05	1525.45	2335.81	335.958	1248.97	122.606	931.26
1954	26789.1	28966.1	116429	17566.4	46657	4869.73	50142.8		1954	7204.63	7262.01	11081.7	2134.01	6096.46	586.836	4410.98		1954	1447.71	1565.36	6291.94	949.311	2521.4	263.166	2709.77		1954	1172.03	1181.36	1802.74	347.154	991.754	95.4647	717.565
1955	24713.6	26862.7	104017	19255.2	43003.6	4419.96	46348.7		1955	6217.42	6265.58	9529.1	2309.33	5395.31	509.07	3786.93		1955	1219.16	1325.18	5131.32	949.888	2121.43	218.043	2286.45		1955	1282.9	1292.84	1966.23	476.508	1113.27	105.041	781.395
1956	23481.8	25642.9	95656.4	21099.1	40787.2	4129.68	44138.8		1956	5727.71	5770.85	8747.97	2564.62	5099.13	471.437	3471.06		1956	1158.04	1264.62	4717.45	1040.54	2011.49	203.662	2176.78		1956	1265.84	1275.38	1933.33	566.789	1126.92	104.189	767.114
1957	23554.6	25827.2	92815.4	23880.1	40804.1	4071.22	44389.9		1957	5730.02	5772.01	8721.85	3009.47	5235.39	474.12	3455.38		1957	1129.22	1238.17	4449.61	1144.82	1956.16	195.176	2128.07		1957	1148.12	1156.54	1747.6	603.007	1049.01	94.9994	692.354
1958	21289.2	23424.7	81099.3	23948.8	36748.2	3614.38	40236.3		1958	5589.12	5628.96	8479.42	3374.83	5243	464.921	3354.3		1958	956.012	1051.91	3641.84	1075.44	1650.21	162.307	1806.85		1958	858.261	864.379	1302.09	518.236	805.11	71.3929	515.083
1959	22035	24315.8	81103.4	27141.9	37866.1	3672.57	41777.9		1959	4662.76	4695.11	7051.55	3187.55	4492.49	389.939	2785.38		1959	996.47	1099.61	3667.67	1227.42	1712.39	166.081	1889.29		1959	835.505	841.301	1263.54	571.165	804.994	69.8718	499.103
1960	23863.5	26395.1	84818.1	31840.4	40789.3	3902.37	45401		1960	4803.2	4835.64	7241.72	3672.68	4754.94	403.846	2856.45		1960	1074.51	1188.51	3819.15	1433.69	1836.64	175.714	2044.3		1960	1081.94	1089.25	1631.22	827.285	1071.07	90.9677	643.425
1961	23807.3	26379.7	81669.5	34101.4	40439.8	3817.66	45463.2		1961	4497.46	4527.06	6760.89	3808.91	4576.29	380.189	2663.14		1961	1180.33	1307.86	4049.04	1690.69	2004.94	189.273	2253.99		1961	1172.68	1180.39	1762.85	993.143	1193.23	99.1311	694.392
1962	24584.2	27273.6	81352.7	37517.2	41462.2	3863.54	47134.3		1962	4344.46	4372.33	6512.64	4042.34	4545.39	369.257	2561.98		1962	1409.42	1563.61	4663.98	2150.88	2377.04	221.498	2702.23		1962	1334.51	1343.07	2000.52	1241.71	1396.23	113.426	786.976
1963	24027.4	26673.7	76660.1	38810.8	40198.7	3698.52	46262.7		1963	4502.56	4530.75	6731.79	4571.64	4845.56	384.795	2644.86		1963	1318.52	1463.74	4206.78	2129.77	2205.93	202.959	2538.7		1963	1410.44	1419.27	2108.75	1432.08	1517.89	120.538	828.511
1964	29862.1	33154.9	91815.5	50764.3	49515.5	4499.64	57755.4		1964	5827.35	5862.98	8690.8	6419.32	6452.98	500.763	3410.47		1964	1783.97	1980.69	5485.1	3032.69	2958.08	268.811	3450.34		1964	1492.5	1501.63	2225.89	1644.12	1652.74	128.256	873.49
1965	30953.5	34352.5	91671.8	55100.8	50822.3	4562.98	60149.5		1965	5409.15	5441.5	8048.39	6432.74	6165.64	467.41	3154.82		1965	1844.02	2046.51	5461.25	3282.57	3027.68	271.835	3583.34		1965	1376.93	1385.16	2048.76	1637.49	1569.5	118.982	803.078
1966	31336.3	34744.6	89353.5	58151.8	50900.3	4516.57	61195.2		1966	5450.72	5482.64	8092.88	6967.79	6397.59	473.638	3168.94		1966	1837.73	2037.61	5240.17	3410.33	2985.07	264.876	3588.81		1966	1588.47	1597.77	2358.46	2030.58	1864.41	138.029	923.504
1967	32700.6	36204.2	89737.5	63007.2	52499.6	4605.47	64189.3		1967	6159.57	6194.96	9127.53	8431.86	7446.97	538.249	3570.63		1967	1923.45	2129.53	5278.37	3706.09	3088.03	270.894	3775.62		1967	1649.09	1658.56	2443.7	2257.45	1993.76	144.104	955.956
1968	33817	37366.2	89277	67407.6	53612	4651.01	66737.1		1968	6125.1	6159.69	9060.65	8948.88	7630.64	538.273	3541.35		1968	1839.82	2032.91	4857.13	3667.32	2916.77	253.039	3630.84		1968	1767.95	1777.93	2615.27	2583.01	2202.51	155.367	1022.18
1969	29602.2	32627.7	75155	60840.8	46298.9	3973.37	58743.7		1969	6104.38	6138.34	9016.26	9490.56	7838.95	539.516	3521.24		1969	1668.9	1839.47	4237.05	3430.05	2610.21	224.009	3311.82		1969	1651.03	1660.22	2438.6	2566.88	2120.18	145.921	952.38
1970	28315.7	31116.6	69111.8	59823.9	43650	3706.94	56512.9		1970	6061.43	6094.73	8941.3	10001.6	8026.21	538.801	3489.59		1970	1501.23	1649.73	3664.14	3171.72	2314.21	196.533	2996.18		1970	1662.57	1671.7	2452.48	2743.31	2201.49	147.786	957.15
1971	28773.8	31510.1	67497.8	62316.1	43676.4	3671.64	57765.9		1971	5623.68	5654.27	8286.95	9824.86	7681.12	502.785	3232.37		1971	1474.43	1614.64	3458.72	3193.2	2238.07	188.142	2960.04		1971	1919.61	1930.05	2828.7	3353.66	2621.9	171.622	1103.35
1972	26782.4	29213	60367.6	59302.6	39991.7	3328.94	54093		1972	4327.84	4351.21	6372.49	7988.34	6099.47	389.187	2484.51		1972	1451.55	1583.28	3271.79	3214.08	2167.46	180.421	2931.73		1972	1576.1	1584.61	2320.71	2909.16	2221.28	141.733	904.798
1973	24705.9	26828.5	53497.6	55794.7	36254.7	2989.28	50208.1		1973	3984.74	4006.17	5864.41	7755.69	5796.78	360.438	2285.67		1973	1417.79	1539.59	3070.04	3201.87	2080.53	171.545	2881.27		1973	1401.23	1408.76	2062.21	2727.28	2038.43	126.748	803.752
1974	22851	24692.4	47528.8	52514.1	32921.3	2689.62	46732		1974	3687.5	3707.33	5425.92	7554.79	5539.03	335.526	2114.36		1974	1181.61	1276.82	2457.67	2715.46	1702.33	139.078	2416.47		1974	1310.27	1317.32	1927.98	2684.43	1968.17	119.222	751.293
1975	26237.5	28199.3	52414.7	61226.6	37072.9	3002.16	54003		1975	4377.91	4401.51	6442.61	9425.99	6792.51	400.721	2510.42		1975	1736.06	1865.86	3468.12	4051.17	2453	198.644	3573.21		1975	1137.85	1143.98	1674.48	2449.88	1765.42	104.15	652.476
1976	26632.8	28457.2	51099.3	62979.8	36868.8	2960.4	55175.1		1976	4567.21	4592.01	6724.31	10319.1	7321.95	420.56	2620.46		1976	1546.83	1652.79	2967.84	3657.86	2141.34	171.94	3204.57		1976	1197.75	1204.25	1763.45	2706.2	1920.18	110.292	687.217
1977	26651.7	28298.5	49114.3	63744.6	36108.7	2875.91	55580.7		1977	3347.01	3365.38	4931.86	7924.97	5546.17	310.067	1922.45		1977	1475.22	1566.37	2718.56	3528.37	1998.68	159.187	3076.49		1977	1318.22	1325.46	1942.42	3121.25	2184.36	122.12	757.158
1978	24784.9	26139.3	43873.5	59847.4	32827.9	2594.42	52035		1978	3094.03	3111.26	4564.56	7667.89	5301.15	288.379	1780.05		1978	1305.17	1376.49	2310.37	3151.56	1728.72	136.622	2740.16		1978	1060.95	1066.85	1565.19	2629.33	1817.77	98.8855	610.381
1979	21684.7	22705.9	36879.2	52771	28047.2	2200.34	45835.6		1979	2795.15	2811.01	4130.23	7242.27	4953.48	262.123	1611.66		1979	1172.96	1228.19	1994.85	2854.46	1517.12	119.02	2479.31		1979	852.179	857.015	1259.22	2208.01	1510.21	79.9157	491.36
1980	21335.1	22170.2	34869.9	52238.7	26915.8	2096.93	45405.8		1980	2371.95	2385.73	3512	6418.6	4349.33	223.816	1371.52		1980	1103.45	1146.64	1803.47	2701.78	1392.08	108.453	2348.38		1980	742.313	746.624	1099.1	2008.73	1361.14	70.0442	429.223
1981	17962.7	18516.2	28223.4	44180.4	22077.1	1708.74	38492.9		1981	2254.18	2267.64	3345.89	6364.59	4278.29	214.032	1307.96		1981	967.628	997.444	1520.36	2379.94	1189.27	92.0478	2073.56		1981	769.419	774.011	1142.05	2172.42	1460.31	73.0555	446.444
1982	16105.8	16462.1	24338.5	39730.7	19260.7	1481.69	34753.7		1982	1810.12	1821.26	2694.69	5327.81	3557.17	172.951	1054.66		1982	825.314	843.569	1247.18	2035.93	986.979	75.9262	1780.89		1982	773.875	778.64	1152.05	2277.79	1520.79	73.9415	450.898
1983	18618.2	18861.8	27074.3	45995.7	21636.6	1655.09	40455.8		1983	1933.65	1945.98	2888.53	5928.24	3935.94	185.928	1132.14		1983	823.095	833.862	1196.93	2033.43	956.532	73.1701	1788.51		1983	1046.09	1052.76	1562.67	3207.13	2129.31	100.586	612.479
1984	19693.6	19766.7	27575.9	48652.9	22210.3	1690.25	43092.6		1984	1987.06	2000.24	2980.13	6340.69	4190.94	192.288	1169.97		1984	976.678	980.303	1367.59	2412.87	1101.49	83.8253	2137.12		1984	1103.22	1110.54	1654.58	3520.36	2326.82	106.759	649.569
1985	18564	18453.1	25048.7	45797.6	20289.5	1536.93	40906.3		1985	1898.38	1911.52	2860.04	6300.61	4150.21	184.893	1124.94		1985	900.686	895.308	1215.31	2222.01	984.407	74.5686	1984.69		1985	1110.56	1118.25	1673.15	3685.91	2427.91	108.164	658.099
1986	19744.5	19429.6	25694.5	48574.5	20882.6	1575.4	43813.9		1986	1878.59	1892.21	2844.75	6480.81	4258.64	184.16	1121.3		1986	944.57	929.504	1229.22	2323.79	999.019	75.3667	2096.04		1986	1027.98	1035.44	1556.67	3546.36	2330.37	100.774	613.588
1987	21067.5	20515.3	26467.3	51615.6	21529	1618.49	47078.9		1987	1743.89	1757.17	2655.94	6249.65	4100.83	172.079	1049.37		1987	1050.59	1023.06	1319.87	2573.96	1073.61	80.7109	2347.73		1987	964.997	972.347	1469.69	3458.3	2269.24	95.2218	580.679
1988	22808.3	21970.4	27692.2	55576.1	22483.8	1685.44	51327.3		1988	1757.13	1771.23	2693.22	6538.01	4287.84	174.537	1066.91		1988	1262.19	1215.83	1532.47	3075.54	1244.24	93.2709	2840.42		1988	955.023	962.69	1463.8	3553.5	2330.5	94.8634	579.879
1989	20362.3	19394.9	23921	49281.4	19329.8	1445.85	46144.5		1989	1895.89	1911.97	2926.48	7320.54	4802.86	189.583	1162.68		1989	1320.32	1257.6	1551.08	3195.49	1253.37	93.7512	2992.09		1989	965.314	973.504	1490.05	3727.35	2445.44	96.5284	591.992
1990	18797.6	17697.6	21395	45129.7	17152.8	1281.17	42896.9		1990	1851.31	1867.95	2879.96	7414.83	4870.72	186.378	1147.83		1990	1200.8	1130.53	1366.72	2882.9	1095.73	81.8417	2740.27		1990	726.776	733.309	1130.6	2910.87	1912.12	73.1672	450.608
1991	17915.1	16665.7	19783.6	42611.8	15683.5	1170.7	41168.3		1991	1729.3	1745.81	2713.18	7181.34	4727.04	175.285	1085.09		1991	1178.5	1096.32	1301.42	2803.12	1031.7	77.0115	2708.16		1991	617.863	623.762	969.393	2565.82	1688.93	62.6277	387.693
1992	16842.7	15475.6	18073.4	39638.9	14116.3	1053.99	38972.5		1992	1562.67	1578.55	2474.67	6725.93	4439.9	159.489	993.402		1992	1131.2	1039.38	1213.86	2662.25	948.091	70.7889	2617.5		1992	670.589	677.403	1061.95	2886.3	1905.29	68.4413	426.298
1993	17497.1	15873.6	18274.6	40693.9	14008.5	1047.25	40766.4		1993	1806.46	1826.03	2889.85	8055.93	5337.12	185.656	1164.73		1993	1105.4	1002.84	1154.52	2570.89	885.009	66.1616	2575.47		1993	614.622	621.281	983.23	2740.91	1815.88	63.1667	396.284
1994	18499.7	16565.2	18839	42465.4	14114.3	1057.63	43398.4		1994	1805.02	1825.91	2919.46	8337.63	5547.88	186.816	1181.74		1994	1149.65	1029.43	1170.74	2638.99	877.122	65.7258	2696.96		1994	577.375	584.057	933.852	2666.97	1774.61	59.757	378.005
1995	19004.5	16790.1	18904	43001.7	13780.8	1036.33	44886.5		1995	1980	2004.51	3240.78	9470.7	6333.92	206.385	1317.84		1995	1088.46	961.634	1082.71	2462.87	789.276	59.3545	2570.82		1995	680.977	689.408	1114.59	3257.24	2178.41	70.9818	453.241
1996	18230.5	15885.8	17747.3	40610.2	12528.2	946.808	43349.7		1996	1671.59	1693.75	2771.32	8277.58	5568.06	175.493	1132.44		1996	1236.23	1077.24	1203.47	2753.84	849.557	64.2044	2939.61		1996	672.405	681.321	1114.78	3329.7	2239.78	70.5932	455.532
1997	18483.8	15880.7	17645.3	40484	12000.1	912.818	44247.3		1997	1724.48	1749	2898.78	8839	5984.26	182.366	1190.66		1997	1099.21	944.406	1049.34	2407.54	713.634	54.2842	2631.34		1997	777.392	788.446	1306.76	3984.6	2697.69	82.21	536.748
1998	17837.4	15105.1	16732.4	38363.2	10902	836.193	42984.1		1998	1517.43	1540.59	2588.88	8049.23	5488.53	161.653	1069.18		1998	986.592	835.466	925.471	2121.88	602.991	46.25	2377.46		1998	749.422	760.862	1278.58	3975.32	2710.65	79.8365	528.043
1999	17833.5	14879.8	16472.6	37613.4	10221	792.121	43258		1999	1697.02	1724.86	2941.71	9314.85	6401.11	182.134	1221.88		1999	1011.76	844.182	934.547	2133.94	579.872	44.9398	2454.18		1999	686.616	697.877	1190.22	3768.79	2589.89	73.6915	494.373
2000	17282.8	14203.4	15752.9	35699.4	9247.84	725.908	42195.9		2000	1525.25	1552.15	2689.35	8662.22	6002.91	164.935	1123.79		2000	1102.72	906.245	1005.11	2277.78	590.055	46.3162	2692.29		2000	801.249	815.38	1412.77	4550.46	3153.46	86.6441	590.35
2001	16760.1	13562.2	15106.9	33858.7	8331.13	664.224	41184		2001	1527.49	1556.48	2742.72	8975.08	6276.16	166.441	1153.3		2001	1103.88	893.257	994.993	2230.06	548.718	43.7482	2712.53		2001	930.814	948.481	1671.35	5469.19	3824.54	101.425	702.791
2002	17910.7	14265.9	15999.1	35338.4	8223.43	668.183	44292.8		2002	1532.06	1563.37	2804.8	9313.11	6575.67	168.234	1187.13		2002	1068.36	850.946	954.332	2107.91	490.52	39.8565	2642.03		2002	916.59	935.323	1678.03	5571.77	3934.04	100.65	710.224
2003	19083.7	14956.7	16929.9	36720.6	8039.4	668.44	47491.9		2003	1518.69	1552.14	2838.33	9550.98	6813.09	168.076	1209.48		2003	1094.21	857.573	970.716	2105.46	460.957	38.3265	2723.05		2003	931.371	951.88	1740.66	5857.34	4178.28	103.076	741.741
2004	20652.2	15921.4	18234.1	38697.1	7920.36	677.237	51716.3		2004	1554.17	1591.07	2969.11	10112.4	7292.21	173.374	1274.11		2004	1191.66	918.681	1052.12	2232.86	457.013	39.0773	2984.08		2004	968.092	991.074	1849.45	6298.98	4542.31	107.995	793.643
2005	21629	16396.5	19044.7	39404.1	7481.01	661.921	54496.5		2005	1524.71	1563.75	2981.51	10264.8	7487.21	171.464	1288.72		2005	1053.98	799.002	928.048	1920.16	364.55	32.2554	2655.62		2005	796.709	817.108	1557.93	5363.66	3912.29	89.5951	673.397
2006	22081.5	16455.1	19429.4	39050.5	6809.76	628.427	55975.7		2006	1475.85	1516.63	2958.18	10281.6	7590.1	167.333	1288.19		2006	1197.08	892.066	1053.31	2117.01	369.171	34.0683	3034.55		2006	822.512	845.237	1648.63	5730.07	4230.06	93.2566	717.923
2007	24544.1	17973.6	21622.9	42063.6	6653.17	646.989	62592.5		2007	1452.9	1496.23	2989.39	10475.5	7831.15	166.104	1311.75		2007	1321.34	967.616	1164.08	2264.51	358.175	34.8308	3369.69		2007	659.022	678.679	1355.96	4751.59	3552.15	75.3436	594.999
2008	20815.2	14974.2	18394.8	34508.9	4869.3	505.925	53398		2008	1201.89	1240.61	2542.36	8970.31	6794.76	138.573	1124.33		2008	1050.53	755.739	928.377	1741.65	245.751	25.5338	2694.97		2008	534.961	552.195	1131.6	3992.68	3024.35	61.679	500.44
2009	17790	12568.1	15798.4	28477.9	3504.44	396.631	45904.7		2009	929.473	961.83	2024.49	7182.66	5515.87	108.09	902.467		2009	903.951	638.614	802.75	1447.02	178.068	20.1537	2332.52		2009	430.243	445.221	937.117	3324.78	2553.24	50.0336	417.742
2010	15378.9	10666.1	13747.2	23723.3	2464.65	312.63	39912.1		2010	860.732	893.127	1933.58	6888.8	5366.37	100.976	868.948		2010	808.428	560.691	722.654	1247.07	129.561	16.4342	2098.08		2010	341.448	354.298	767.042	2732.75	2128.81	40.0564	344.707
2011	16633.7	11321.9	14990.8	24674.3	2058.67	306.153	43414.6		2011	748.416	778.884	1736.95	6205.65	4906.59	88.5855	787.018		2011	825.706	562.022	744.148	1224.84	102.193	15.1975	2155.12		2011	281.635	293.101	653.63	2335.24	1846.39	33.3355	296.162
2012	17071.9	11400.2	15534.8	24297.4	1493.95	282.122	44808.1		2012	708.488	739.703	1701.72	6088.51	4888.83	84.6255	777.488		2012	801.976	535.54	729.77	1141.41	70.1802	13.2531	2104.92		2012	261.32	272.833	627.666	2245.69	1803.2	31.2134	286.77
2013	16364.8	10717.6	15056.6	22292.4	842.928	240.368	43189.6		2013	686.589	719.346	1709.85	6117.85	4991.63	82.7747	787.775		2013	838.875	549.397	771.816	1142.73	43.2093	12.3215	2213.94		2013	245.502	257.215	611.386	2187.55	1784.84	29.5975	281.683
2014	17836.4	11452.8	16613.9	23194.3	281.365	229.962	47329.8		2014	680.739	715.931	1761.03	6292.48	5219.91	82.8517	818.23		2014	935.652	600.781	871.52	1216.71	14.7597	12.0632	2482.8		2014	240.723	253.167	622.735	2225.14	1845.86	29.298	289.342

## Sheet: Data Sheet 4
The floor area of each dwelling type in England for cohorts (m2)								Interpolated floor area of each dwelling type in England for cohorts (m2)											The floor area of each dwelling type in Scotland for years (m2)								Interpolated floor area of each dwelling type in Scotland for year (m2)											floor area of each dwelling type in the UK for year (m2)
								Year			End terrace	Mid terrace	Semi detached	Detached	Bungalow	Coverted flat	Purpose built flat										Year			End terrace	Mid terrace	Semi detached	Detached	Bungalow	Coverted flat	Purpose built flat		Year	End terrace	Mid terrace	Semi detached	Detached	Bungalow	Coverted flat	Purpose built flat
	1945-1964	1965-1974	1975-1980	1981-1990	1991-2002	Post 2002		1949	1	1	83.7048	86.9292	96.5909	166.61	72.5705	58.946	61.1502			1945-1964	1965-1974	1975-1980	1981-1990	1991-2002	Post 2002		1949	1	1	82.8801	77.8801	95.1398	131.62	62.9201	70.5816	69.0799		1949	83.2925	82.4047	95.8654	149.115	67.7453	64.7638	65.115
End terrace	78.6477	84.7042	79.7029	66.4576	80.8378	83.3517		1950	2	4	83.2801	86.0355	95.6883	163.934	73.1006	58.7654	60.4816		End terrace	83	83	83	83	89	89		1950	2	4	82.8306	77.8306	95.1976	131.464	62.8871	70.4937	69.1129		1950	83.0553	81.9331	95.443	147.699	67.9938	64.6296	64.7973
Mid terrace	78.4123	80.3273	76.9858	67.5369	67.7633	86.3163		1951	3	9	82.869	85.1694	94.8081	161.359	73.6098	58.5848	59.8343		Mid terrace	78	78	78	78	84	84		1951	3	9	82.7866	77.7866	95.249	131.324	62.8577	70.4059	69.1423		1951	82.8278	81.478	95.0286	146.342	68.2338	64.4953	64.4883
Semi detached	88.3179	89.3076	81.6994	73.5284	74.297	84.9433		1952	4	16	82.4714	84.3308	93.9502	158.886	74.098	58.4042	59.2082		Semi detached	95	95	95	95	88	88		1952	4	16	82.748	77.748	95.294	131.202	62.832	70.318	69.168		1952	82.6097	81.0394	94.6221	145.044	68.465	64.3611	64.1881
Detached	148.536	139.079	130.937	133.896	140.228	192.429		1953	5	25	82.0874	83.5197	93.1147	156.514	74.5653	58.2236	58.6032		Detached	132	132	132	132	151	151		1953	5	25	82.7148	77.7148	95.3327	131.097	62.8099	70.2301	69.1901		1953	82.4011	80.6173	94.2237	143.805	68.6876	64.2268	63.8966
bungalow	73.3142	81.05	87.1643	73.3295	70.4458	69.1529		1954	6	36	81.717	82.7362	92.3015	154.243	75.0117	58.0429	58.0194		bungalow	63	63	63	63	67	67		1954	6	36	82.6872	77.6872	95.3649	131.009	62.7915	70.1422	69.2085		1954	82.2021	80.2117	93.8332	142.626	68.9016	64.0926	63.614
coverted flat	57.8847	58.1555	46.5225	57.1714	50	48		1955	7	49	81.3602	81.9802	91.5106	152.073	75.437	57.8623	57.4568		coverted flat	69	69	69	69	65	65		1955	7	49	82.665	77.665	95.3908	130.939	62.7767	70.0543	69.2233		1955	82.0126	79.8226	93.4507	141.506	69.1069	63.9583	63.3401
purpose built flat	55.6486	56.6047	49.2559	48.581	50.9572	60.2379		1956	8	64	81.0169	81.2517	90.7421	150.005	75.8414	57.6817	56.9154		purpose built flat	69	69	69	69	65	65		1956	8	64	82.6483	77.6483	95.4103	130.886	62.7656	69.9664	69.2344		1956	81.8326	79.45	93.0762	140.445	69.3035	63.8241	63.0749
								1957	9	81	80.6872	80.5508	89.9959	148.038	76.2249	57.5011	56.3952										1957	9	81	82.6371	77.6371	95.4234	130.851	62.7581	69.8785	69.2419		1957	81.6622	79.0939	92.7096	139.444	69.4915	63.6898	62.8186
Source	https://www.gov.uk/government/statistics/english-housing-survey-2017-to-2018-headline-report							1958	10	100	80.3711	79.8774	89.272	146.172	76.5874	57.3205	55.8962		Source	https://www.gov.scot/publications/scottish-house-condition-survey-2017-key-findings/pages/4/							1958	10	100	82.6313	77.6313	95.4301	130.833	62.7542	69.7906	69.2458		1958	81.5012	78.7544	92.351	138.502	69.6708	63.5556	62.571
								1959	11	121	80.0685	79.2315	88.5705	144.408	76.9289	57.1399	55.4184										1959	11	121	82.6311	77.6311	95.4304	130.832	62.754	69.7027	69.246		1959	81.3498	78.4313	92.0004	137.62	69.8415	63.4213	62.3322
								1960	12	144	79.7795	78.6132	87.8913	142.744	77.2495	56.9593	54.9617										1960	12	144	82.6362	77.6362	95.4244	130.848	62.7575	69.6149	69.2425		1960	81.2079	78.1247	91.6578	136.796	70.0035	63.2871	62.1021
								1961	13	169	79.5041	78.0224	87.2344	141.183	77.5492	56.7787	54.5262										1961	13	169	82.6469	77.6469	95.412	130.882	62.7646	69.527	69.2354		1961	81.0755	77.8346	91.3232	136.032	70.1569	63.1528	61.8808
Assuption for Northern Ireland								1962	14	196	79.2423	77.4591	86.5999	139.722	77.8278	56.598	54.112		Assuption for Wales								1962	14	196	82.663	77.663	95.3931	130.933	62.7753	69.4391	69.2247		1962	80.9526	77.5611	90.9965	135.328	70.3016	63.0186	61.6683
Northern Ireland has the same floor area of each dwelling type as England for years.								1963	15	225	78.994	76.9234	85.9877	138.363	78.0856	56.4174	53.7189		Wales has the same floor area of each dwelling type as Scotland for years.								1963	15	225	82.6846	77.6846	95.3679	131.001	62.7897	69.3512	69.2103		1963	80.8393	77.304	90.6778	134.682	70.4377	62.8843	61.4646
								1964	16	256	78.7593	76.4152	85.3978	137.105	78.3223	56.2368	53.347										1964	16	256	82.7117	77.7117	95.3364	131.087	62.8078	69.2633	69.1922		1964	80.7355	77.0635	90.3671	134.096	70.5651	62.7501	61.2696
								1965	17	289	78.5381	75.9346	84.8303	135.949	78.5381	56.0562	52.9963										1965	17	289	82.7442	77.7442	95.2984	131.19	62.8295	69.1754	69.1705		1965	80.6412	76.8394	90.0643	133.569	70.6838	62.6158	61.0834
								1966	18	324	78.3305	75.4814	84.2851	134.893	78.733	55.8756	52.6668										1966	18	324	82.7823	77.7823	95.254	131.31	62.8548	69.0875	69.1452		1966	80.5564	76.6318	89.7696	133.102	70.7939	62.4816	60.906
								1967	19	361	78.1365	75.0559	83.7623	133.939	78.9069	55.695	52.3584										1967	19	361	82.8257	77.8257	95.2033	131.448	62.8838	68.9996	69.1162		1967	80.4811	76.4408	89.4828	132.694	70.8953	62.3473	60.7373
								1968	20	400	77.9561	74.6578	83.2617	133.087	79.0598	55.5144	52.0713										1968	20	400	82.8747	77.8747	95.1462	131.603	62.9165	68.9118	69.0835		1968	80.4154	76.2663	89.204	132.345	70.9881	62.2131	60.5774
								1969	21	441	77.7892	74.2873	82.7836	132.336	79.1918	55.3337	51.8053										1969	21	441	82.9291	77.9291	95.0827	131.776	62.9527	68.8239	69.0473		1969	80.3592	76.1082	88.9331	132.056	71.0723	62.0788	60.4263
								1970	22	484	77.6359	73.9443	82.3277	131.686	79.3028	55.1531	51.5606										1970	22	484	82.989	77.989	95.0128	131.965	62.9927	68.736	69.0073		1970	80.3125	75.9667	88.6703	131.825	71.1477	61.9446	60.2839
								1971	23	529	77.4962	73.6289	81.8942	131.137	79.3929	54.9725	51.337										1971	23	529	83.0544	78.0544	94.9365	132.172	63.0363	68.6481	68.9637		1971	80.2753	75.8416	88.4154	131.655	71.2146	61.8103	60.1504
								1972	24	576	77.37	73.3409	81.483	130.689	79.462	54.7919	51.1346										1972	24	576	83.1252	78.1252	94.8539	132.397	63.0835	68.5602	68.9165		1972	80.2476	75.7331	88.1685	131.543	71.2727	61.6761	60.0255
								1973	25	625	77.2574	73.0806	81.0942	130.343	79.5101	54.6113	50.9534										1973	25	625	83.2016	78.2016	94.7649	132.638	63.1344	68.4723	68.8656		1973	80.2295	75.6411	87.9295	131.491	71.3223	61.5418	59.9095
								1974	26	676	77.1584	72.8477	80.7277	130.099	79.5373	54.4307	50.7934										1974	26	676	83.2833	78.2833	94.6694	132.897	63.1889	68.3844	68.8111		1974	80.2209	75.5655	87.6986	131.498	71.3631	61.4076	59.8022
								1975	27	729	77.0729	72.6424	80.3835	129.955	79.5436	54.2501	50.6545										1975	27	729	83.3706	78.3706	94.5676	133.174	63.2471	68.2965	68.7529		1975	80.2218	75.5065	87.4756	131.564	71.3953	61.2733	59.7037
								1976	28	784	77.001	72.4646	80.0617	129.913	79.5289	54.0695	50.5369										1976	28	784	83.4633	78.4633	94.4594	133.467	63.3089	68.2086	68.6911		1976	80.2322	75.464	87.2606	131.69	71.4189	61.1391	59.614
								1977	29	841	76.9427	72.3144	79.7622	129.972	79.4932	53.8888	50.4404										1977	29	841	83.5615	78.5615	94.3449	133.778	63.3744	68.1208	68.6256		1977	80.2521	75.438	87.0535	131.875	71.4338	61.0048	59.533
								1978	30	900	76.8979	72.1917	79.4851	130.133	79.4366	53.7082	50.3652										1978	30	900	83.6652	78.6652	94.2239	134.106	63.4435	68.0329	68.5565		1978	80.2816	75.4285	86.8545	132.12	71.44	60.8705	59.4608
								1979	31	961	76.8667	72.0965	79.2302	130.394	79.359	53.5276	50.3111										1979	31	961	83.7744	78.7744	94.0966	134.452	63.5162	67.945	68.4838		1979	80.3206	75.4354	86.6634	132.423	71.4376	60.7363	59.3974
								1980	32	1024	76.8491	72.0289	78.9977	130.758	79.2604	53.347	50.2782										1980	32	1024	83.889	78.889	93.9629	134.815	63.5926	67.8571	68.4074		1980	80.3691	75.4589	86.4803	132.786	71.4265	60.602	59.3428
								1981	33	1089	76.8451	71.9888	78.7876	131.222	79.1409	53.1664	50.2665										1981	33	1089	84.0091	79.0091	93.8228	135.195	63.6727	67.7692	68.3273		1981	80.4271	75.4989	86.3052	133.209	71.4068	60.4678	59.2969
								1982	34	1156	76.8546	71.9762	78.5998	131.788	79.0005	52.9858	50.276										1982	34	1156	84.1346	79.1346	93.6763	135.593	63.7564	67.6813	68.2436		1982	80.4946	75.5554	86.138	133.69	71.3784	60.3335	59.2598
								1983	35	1225	76.8777	71.9912	78.4343	132.455	78.8391	52.8052	50.3066										1983	35	1225	84.2657	79.2657	93.5234	136.008	63.8438	67.5934	68.1562		1983	80.5717	75.6284	85.9789	134.231	71.3414	60.1993	59.2314
								1984	36	1296	76.9144	72.0337	78.2912	133.223	78.6567	52.6246	50.3585										1984	36	1296	84.4022	79.4022	93.3642	136.44	63.9348	67.5055	68.0652		1984	80.6583	75.7179	85.8277	134.832	71.2957	60.065	59.2119
								1985	37	1369	76.9646	72.1037	78.1703	134.093	78.4534	52.4439	50.4315										1985	37	1369	84.5441	79.5441	93.1985	136.89	64.0294	67.4176	67.9706		1985	80.7544	75.8239	85.6844	135.491	71.2414	59.9308	59.2011
								1986	38	1444	77.0284	72.2013	78.0719	135.064	78.2291	52.2633	50.5258										1986	38	1444	84.6916	79.6916	93.0265	137.357	64.1277	67.3298	67.8723		1986	80.86	75.9464	85.5492	136.21	71.1784	59.7965	59.199
								1987	39	1521	77.1057	72.3264	77.9957	136.136	77.9839	52.0827	50.6412										1987	39	1521	84.8445	79.8445	92.8481	137.841	64.2297	67.2419	67.7703		1987	80.9751	76.0855	85.4219	136.988	71.1068	59.6623	59.2058
								1988	40	1600	77.1967	72.4791	77.9419	137.309	77.7177	51.9021	50.7778										1988	40	1600	85.0029	80.0029	92.6633	138.342	64.3353	67.154	67.6647		1988	81.0998	76.241	85.3026	137.826	71.0265	59.528	59.2213
								1989	41	1681	77.3012	72.6592	77.9105	138.584	77.4305	51.7215	50.9356										1989	41	1681	85.1667	80.1667	92.4721	138.861	64.4445	67.0661	67.5555		1989	81.234	76.413	85.1913	138.723	70.9375	59.3938	59.2456
								1990	42	1764	77.4193	72.867	77.9013	139.96	77.1224	51.5409	51.1146										1990	42	1764	85.3361	80.3361	92.2746	139.398	64.5574	66.9782	67.4426		1990	81.3777	76.6015	85.0879	139.679	70.8399	59.2595	59.2786
								1991	43	1849	77.5509	73.1022	77.9145	141.438	76.7933	51.3603	51.3148										1991	43	1849	85.5109	80.5109	92.0706	139.951	64.6739	66.8903	67.3261		1991	81.5309	76.8065	84.9926	140.695	70.7336	59.1253	59.3204
								1992	44	1936	77.6961	73.365	77.9501	143.017	76.4433	51.1797	51.5361										1992	44	1936	85.6912	80.6912	91.8603	140.522	64.7941	66.8024	67.2059		1992	81.6936	77.0281	84.9052	141.769	70.6187	58.991	59.371
								1993	45	2025	77.8549	73.6553	78.0079	144.697	76.0724	50.999	51.7787										1993	45	2025	85.8769	80.8769	91.6436	141.11	64.9179	66.7145	67.0821		1993	81.8659	77.2661	84.8258	142.904	70.4951	58.8568	59.4304
								1994	46	2116	78.0272	73.9731	78.0882	146.478	75.6804	50.8184	52.0424										1994	46	2116	86.0681	81.0681	91.4205	141.716	65.0454	66.6267	66.9546		1994	82.0477	77.5206	84.7543	144.097	70.3629	58.7225	59.4985
								1995	47	2209	78.2132	74.3185	78.1907	148.361	75.2675	50.6378	52.3273										1995	47	2209	86.2648	81.2648	91.191	142.339	65.1765	66.5388	66.8235		1995	82.239	77.7917	84.6909	145.35	70.222	58.5883	59.5754
								1996	48	2304	78.4126	74.6914	78.3156	150.345	74.8337	50.4572	52.6335										1996	48	2304	86.467	81.467	90.9552	142.979	65.3113	66.4509	66.6887		1996	82.4398	78.0792	84.6354	146.662	70.0725	58.454	59.6611
								1997	49	2401	78.6257	75.0919	78.4628	152.43	74.3789	50.2766	52.9608										1997	49	2401	86.6746	81.6746	90.7129	143.636	65.4497	66.363	66.5503		1997	82.6502	78.3833	84.5879	148.033	69.9143	58.3198	59.7555
								1998	50	2500	78.8523	75.5199	78.6324	154.617	73.9031	50.096	53.3093										1998	50	2500	86.8877	81.8877	90.4643	144.311	65.5918	66.2751	66.4082		1998	82.87	78.7038	84.5483	149.464	69.7475	58.1855	59.8587
								1999	51	2601	79.0925	75.9754	78.8242	156.905	73.4064	49.9154	53.6789										1999	51	2601	87.1063	82.1063	90.2093	145.003	65.7375	66.1872	66.2625		1999	83.0994	79.0409	84.5168	150.954	69.572	58.0513	59.9707
								2000	52	2704	79.3463	76.4585	79.0385	159.294	72.8887	49.7347	54.0698										2000	52	2704	87.3304	82.3304	89.9479	145.713	65.8869	66.0993	66.1131		2000	83.3383	79.3944	84.4932	152.504	69.3878	57.917	60.0914
								2001	53	2809	79.6136	76.9691	79.275	161.785	72.3501	49.5541	54.4818										2001	53	2809	87.5599	82.5599	89.6801	146.44	66.0399	66.0114	65.9601		2001	83.5867	79.7645	84.4776	154.112	69.195	57.7828	60.221
								2002	54	2916	79.8945	77.5072	79.5339	164.377	71.7905	49.3735	54.9151										2002	54	2916	87.7949	82.7949	89.406	147.184	66.1966	65.9235	65.8034		2002	83.8447	80.151	84.47	155.78	68.9936	57.6485	60.3593
								2003	55	3025	80.189	78.0729	79.8151	167.07	71.21	49.1929	55.3695										2003	55	3025	88.0353	83.0353	89.1255	147.945	66.3569	65.8357	65.6431		2003	84.1121	80.5541	84.4703	157.508	68.7834	57.5143	60.5063
								2004	56	3136	80.497	78.6661	80.1187	169.864	70.6085	49.0123	55.8451										2004	56	3136	88.2813	83.2813	88.8385	148.724	66.5208	65.7478	65.4792		2004	84.3891	80.9737	84.4786	159.294	68.5647	57.38	60.6621
								2005	57	3249	80.8186	79.2868	80.4446	172.76	69.986	48.8317	56.3419										2005	57	3249	88.5327	83.5327	88.5452	149.52	66.6884	65.6599	65.3116		2005	84.6756	81.4097	84.4949	161.14	68.3372	57.2458	60.8267
								2006	58	3364	81.1538	79.935	80.7929	175.757	69.3426	48.6511	56.8599										2006	58	3364	88.7896	83.7896	88.2455	150.334	66.8597	65.572	65.1403		2006	84.9717	81.8623	84.5192	163.045	68.1012	57.1115	61.0001
								2007	59	3481	81.5025	80.6108	81.1634	178.856	68.6783	48.4705	57.3991										2007	59	3481	89.0519	84.0519	87.9394	151.164	67.0346	65.4841	64.9654		2007	85.2772	82.3314	84.5514	165.01	67.8564	56.9773	61.1823
								2008	60	3600	81.8648	81.3142	81.5563	182.056	67.993	48.2898	57.9595										2008	60	3600	89.3197	84.3197	87.627	152.012	67.2131	65.3962	64.7869		2008	85.5923	82.817	84.5917	167.034	67.603	56.843	61.3732
								2009	61	3721	82.2407	82.0451	81.9716	185.357	67.2867	48.1092	58.541										2009	61	3721	89.593	84.593	87.3081	152.878	67.3953	65.3083	64.6047		2009	85.9169	83.319	84.6399	169.117	67.341	56.7088	61.5728
								2010	62	3844	82.6302	82.8035	82.4092	188.759	66.5594	47.9286	59.1438										2010	62	3844	89.8718	84.8718	86.9829	153.761	67.5812	65.2204	64.4188		2010	86.251	83.8376	84.696	171.26	67.0703	56.5745	61.7813
								2011	63	3969	83.0332	83.5894	82.8691	192.263	65.8112	47.748	59.7677										2011	63	3969	90.156	85.156	86.6513	154.661	67.7707	65.1326	64.2293		2011	86.5946	84.3727	84.7602	173.462	66.791	56.4403	61.9985
								2012	64	4096	83.4498	84.4029	83.3513	195.868	65.0421	47.5674	60.4128										2012	64	4096	90.4457	85.4457	86.3133	155.578	67.9638	65.0447	64.0362		2012	86.9478	84.9243	84.8323	175.723	66.503	56.306	62.2245
								2013	65	4225	83.8799	85.2439	83.8559	199.574	64.252	47.3868	61.0791										2013	65	4225	90.7409	85.7409	85.9689	156.513	68.1606	64.9568	63.8394		2013	87.3104	85.4924	84.9124	178.043	66.2063	56.1718	62.4593
								2014	66	4356	84.3237	86.1124	84.3828	203.382	63.4409	47.2062	61.7666										2014	66	4356	91.0416	86.0416	85.6182	157.465	68.361	64.8689	63.639		2014	87.6826	86.077	85.0005	180.423	65.901	56.0375	62.7028
								2015	67	4489	84.7809	87.0085	84.9321	207.29	62.6089	47.0256	62.4753										2015	67	4489	91.3477	86.3477	85.261	158.434	68.5651	64.781	63.4349		2015	88.0643	86.6781	85.0966	182.862	65.587	55.9033	62.9551
								2016	68	4624	85.2518	87.9321	85.5037	211.301	61.7559	46.8449	63.2052										2016	68	4624	91.6593	86.6593	84.8975	159.421	68.7729	64.6931	63.2271		2016	88.4555	87.2957	85.2006	185.361	65.2644	55.769	63.2162
								2017	69	4761	85.7362	88.8833	86.0976	215.412	60.882	46.6643	63.9562										2017	69	4761	91.9763	86.9763	84.5276	160.425	68.9842	64.6052	63.0158		2017	88.8563	87.9298	85.3126	187.919	64.9331	55.6348	63.486

## Sheet: Data Sheet 5
Year	End terrace (ENFA)	Mid terrace (ENFA)	Semi detached (ENFA)	Detached (ENFA)	Bungalow (ENFA)	Coverted flat (ENFA)	Purpose built flat (ENFA)		Year	End terrace (SCFA)	Mid terrace (SCFA)	Semi detached (SCFA)	Detached (SCFA)	Bungalow (SCFA)	Coverted flat (SCDW)	Purpose built flat (SCDW)		Year	End terrace (WAFA)	Mid terrace (WAFA)	Semi detached (WAFA)	Detached (WAFA)	Bungalow (WAFA)	Coverted flat (WAFA)	Purpose built flat (WAFA)		Year	End terrace (NIFA)	Mid terrace (NIFA)	Semi detached (NIFA)	Detached (NIFA)	Bungalow (NIFA)	Coverted flat (NIFA)	Purpose built flat (NIFA)	Year	End terrace	Mid terrace	Semi detached	Detached	Bungalow	Coverted flat	Purpose built flat
1950	1.24007e+06	1.34814e+06	6.9985e+06	303122	1.88553e+06	168856	1.67788e+06		1950	422184	400228	757650	3831.87	246216	28671.4	220393		1950	68109.7	67347.4	384491	13423.5	89575.1	11185.6	105879		1950	119399	124447	214215	1344.07	80505.4	6723.09	54251.3	1950	1.84976e+06	1.94016e+06	8.35486e+06	321721	2.30182e+06	215436	2.0584e+06
1951	1.22621e+06	1.33646e+06	6.68907e+06	626803	1.89188e+06	164931	1.65063e+06		1951	369107	349816	660554	44981.6	220413	25176.7	191804		1951	72613.2	72353.8	398349	30238.8	95763.3	11749.3	113064		1951	113275	117428	201579	16944.8	79134.5	6422.84	50888.1	1951	1.7812e+06	1.87606e+06	7.94955e+06	718968	2.28719e+06	208280	2.00638e+06
1952	1.48151e+06	1.61796e+06	7.80714e+06	1.13401e+06	2.3162e+06	196708	1.98492e+06		1952	490244	464500	874834	115760	299875	33584.8	253578		1952	90956.6	91273.5	484546	57299	120178	14491.7	141887		1952	132610	136742	234086	38047	95981	7570.74	58912.3	1952	2.19532e+06	2.31047e+06	9.4006e+06	1.34511e+06	2.83223e+06	252355	2.4393e+06
1953	1.97603e+06	2.16119e+06	1.00533e+07	1.99089e+06	3.12616e+06	258816	2.63617e+06		1953	616409	583891	1.09676e+06	216925	386378	42409.7	317355		1953	117574	118746	607779	98468.9	155494	18434.3	183784		1953	124203	127405	217499	52582	93130.1	7138.54	54574.8	1953	2.83421e+06	2.99123e+06	1.19754e+07	2.35886e+06	3.76116e+06	326799	3.19188e+06
1954	2.18913e+06	2.39655e+06	1.07465e+07	2.70949e+06	3.49982e+06	282653	2.90926e+06		1954	595731	564165	1.05681e+06	279575	382806	41162	305278		1954	119707	121609	600030	124369	158322	18459	187540		1954	95774.6	97741.3	166395	53545.9	74393.1	5541.05	41632.7	1954	3.00034e+06	3.18006e+06	1.25698e+07	3.16698e+06	4.11534e+06	347815	3.44371e+06
1955	2.0107e+06	2.20221e+06	9.51867e+06	2.92819e+06	3.24406e+06	255749	2.66305e+06		1955	513963	486616	908989	302383	338699	35662.5	262144		1955	100782	102920	489481	124378	133176	15274.9	158276		1955	104377	105987	179931	72463.9	83981.5	6077.94	44896.5	1955	2.72982e+06	2.89773e+06	1.10971e+07	3.42742e+06	3.79992e+06	312765	3.12836e+06
1956	1.90242e+06	2.08353e+06	8.68006e+06	3.16496e+06	3.09336e+06	238207	2.51218e+06		1956	473385	448097	834646	335674	320050	32984.7	240317		1956	95710.3	98195.9	450094	136192	126252	14249.5	150708		1956	102555	103627	175434	85021	85467.5	6009.8	43660.6	1956	2.57407e+06	2.73345e+06	1.01402e+07	3.72185e+06	3.62513e+06	291451	2.94686e+06
1957	1.90055e+06	2.0804e+06	8.353e+06	3.53516e+06	3.11029e+06	234100	2.50338e+06		1957	473512	448122	832268	393792	328563	33130.8	239257		1957	93315.2	96127.8	424596	149801	122765	13638.6	147352		1957	92638.9	93159.9	157276	89267.7	79961	5462.57	39045.5	1957	2.56002e+06	2.71781e+06	9.76714e+06	4.16802e+06	3.64157e+06	286332	2.92903e+06
1958	1.71104e+06	1.87111e+06	7.2399e+06	3.50064e+06	2.81445e+06	207178	2.24906e+06		1958	461837	436984	809192	441537	329020	32447.1	232271		1958	78996.6	81661.1	347541	140703	103558	11327.5	125117		1958	68979.4	69044.4	116240	75751.5	61661.3	4092.28	28791.2	1958	2.32085e+06	2.4588e+06	8.51287e+06	4.15863e+06	3.30869e+06	255045	2.63523e+06
1959	1.76431e+06	1.92658e+06	7.18336e+06	3.9195e+06	2.913e+06	209850	2.31526e+06		1959	385289	364487	672932	417032	281922	27179.8	192877		1959	82339.3	85364.2	350007	160585	107459	11576.3	130825		1959	66897.6	66657.6	111913	82480.6	61927.3	3992.47	27659.5	1959	2.29884e+06	2.44309e+06	8.31821e+06	4.5796e+06	3.36431e+06	252599	2.66662e+06
1960	1.90382e+06	2.07501e+06	7.45477e+06	4.54504e+06	3.15095e+06	222276	2.49532e+06		1960	396918	375421	691036	480564	298408	28113.7	197788		1960	88793.8	92271.3	364440	187596	115263	12232.3	141552		1960	86316.5	85629.1	143370	118090	82739.4	5181.45	35363.7	1960	2.47585e+06	2.62833e+06	8.65361e+06	5.33129e+06	3.64736e+06	267804	2.87002e+06
1961	1.89278e+06	2.05821e+06	7.12439e+06	4.81452e+06	3.13607e+06	216762	2.47894e+06		1961	371701	351512	645070	498517	287229	26433.4	184384		1961	97550.5	101551	386327	221281	125839	13159.6	156056		1961	93232.6	92097.1	153781	140215	92533.9	5628.53	37862.6	1961	2.45526e+06	2.60337e+06	8.30957e+06	5.67454e+06	3.64167e+06	261983	2.85724e+06
1962	1.94811e+06	2.11259e+06	7.04513e+06	5.24198e+06	3.22691e+06	218669	2.55053e+06		1962	359126	339568	621261	529275	285339	25640.8	177352		1962	116507	121434	444912	281620	149220	15380.6	187061		1962	105749	104033	173245	173494	108666	6419.71	42584.8	1962	2.52949e+06	2.67763e+06	8.28455e+06	6.22637e+06	3.77014e+06	266110	2.95753e+06
1963	1.89802e+06	2.05183e+06	6.59183e+06	5.36998e+06	3.13894e+06	208661	2.48518e+06		1963	372293	351969	641997	598890	304252	26686	183052		1963	109021	113710	401192	279002	138510	14075.4	175704		1963	111416	109175	181327	198147	118525	6800.45	44506.7	1963	2.49075e+06	2.62668e+06	7.81634e+06	6.44602e+06	3.70022e+06	256223	2.88844e+06
1964	2.35191e+06	2.53354e+06	7.84084e+06	6.96005e+06	3.87817e+06	253046	3.08108e+06		1964	481990	455622	828549	841490	405298	34684.5	235978		1964	147556	153923	522930	397546	185791	18618.7	238736		1964	117548	114747	190086	225417	129446	7212.7	46598.1	1964	3.09901e+06	3.25783e+06	9.38241e+06	8.42451e+06	4.5987e+06	313562	3.60239e+06
1965	2.43103e+06	2.60854e+06	7.77655e+06	7.49088e+06	3.99149e+06	255783	3.1877e+06		1965	447576	423045	766999	843912	387384	32333.3	218221		1965	152582	159105	520449	430641	190228	18804.3	247862		1965	108141	105182	173797	222615	123266	6669.68	42560.2	1965	3.13933e+06	3.29587e+06	9.23779e+06	8.98805e+06	4.69236e+06	313590	3.69634e+06
1966	2.45459e+06	2.62257e+06	7.53117e+06	7.84429e+06	4.00753e+06	252366	3.22295e+06		1966	451222	426452	770880	914943	402120	32722.5	219117		1966	152131	158490	499147	447812	187626	18299.6	248149		1966	124426	120602	198783	273912	146791	7712.47	48638	1966	3.18237e+06	3.32812e+06	8.99998e+06	9.48096e+06	4.74407e+06	311100	3.73886e+06
1967	2.55511e+06	2.71733e+06	7.51661e+06	8.43915e+06	4.14258e+06	256502	3.36085e+06		1967	510171	482127	868972	1.10835e+06	468294	37139	246788		1967	159311	165732	502518	487158	194187	18691.6	260957		1967	128854	124485	204689	302361	157322	8025.88	50052.4	1967	3.35344e+06	3.48968e+06	9.09279e+06	1.0337e+07	4.96238e+06	320358	3.91865e+06
1968	2.63624e+06	2.78968e+06	7.43335e+06	8.97107e+06	4.23856e+06	258198	3.47509e+06		1968	507616	479684	862087	1.1777e+06	480093	37093.3	244649		1968	152475	158312	462137	482631	183513	17437.4	250832		1968	137822	132737	217752	343764	174130	8625.11	53226	1968	3.43415e+06	3.56041e+06	8.97533e+06	1.09752e+07	5.07629e+06	321354	4.02379e+06
1969	2.30273e+06	2.42382e+06	6.2216e+06	8.0514e+06	3.66649e+06	219862	3.04324e+06		1969	506231	478355	857291	1.25062e+06	493484	37131.6	243132		1969	138400	143348	402870	451997	164320	15417.2	228672		1969	128432	123333	201876	339690	167901	8074.36	49338.3	1969	3.07579e+06	3.16886e+06	7.68363e+06	1.00937e+07	4.49219e+06	280485	3.56438e+06
1970	2.19832e+06	2.3009e+06	5.68982e+06	7.87795e+06	3.46156e+06	204449	2.91384e+06		1970	503032	475322	849538	1.31986e+06	505593	37035	240808		1970	124586	128661	348140	418557	145779	13508.9	206758		1970	129075	123613	201907	361254	174584	8150.87	49351.2	1970	2.95501e+06	3.02849e+06	7.0894e+06	9.97762e+06	4.28752e+06	263144	3.41076e+06
1971	2.22986e+06	2.32005e+06	5.52768e+06	8.17194e+06	3.4676e+06	201839	2.96552e+06		1971	467071	441340	786734	1.29857e+06	484189	34515.2	222917		1971	122458	126030	328359	422053	141079	12915.6	204135		1971	148762	142107	231654	439788	208160	9434.52	56642.7	1971	2.96815e+06	3.02953e+06	6.87443e+06	1.03324e+07	4.30103e+06	258705	3.44922e+06
1972	2.07215e+06	2.14251e+06	4.91893e+06	7.75023e+06	3.17782e+06	182399	2.76603e+06		1972	359753	339940	604456	1.05763e+06	384776	26682.8	171223		1972	120660	123694	310342	425533	136731	12369.7	202044		1972	121943	116217	189099	380197	176508	7765.81	46266.5	1972	2.67451e+06	2.72236e+06	6.02283e+06	9.61359e+06	3.87583e+06	229217	3.18556e+06
1973	1.90871e+06	1.96064e+06	4.33835e+06	7.27247e+06	2.88262e+06	163249	2.55827e+06		1973	331536	313289	555740	1.0287e+06	365976	24680	157404		1973	117962	120399	290932	424690	131353	11746.1	198420		1973	108255	102953	167233	355482	162076	6921.85	40953.9	1973	2.46647e+06	2.49728e+06	5.35225e+06	9.08135e+06	3.54202e+06	206597	2.95505e+06
1974	1.76315e+06	1.79878e+06	3.83689e+06	6.83201e+06	2.61847e+06	146398	2.37367e+06		1974	307108	290222	513669	1.00401e+06	350005	22944.8	145492		1974	98408.2	99953.7	232666	360877	107568	9510.78	166280		1974	101099	95963.6	155642	349241	156543	6489.33	38160.7	1974	2.26976e+06	2.28492e+06	4.73886e+06	8.54614e+06	3.23259e+06	185343	2.72361e+06
1975	2.0222e+06	2.04847e+06	4.21328e+06	7.95671e+06	2.94891e+06	162867	2.7355e+06		1975	364989	344949	609263	1.25529e+06	429607	27367.9	172599		1975	144736	146229	327972	539509	155145	13566.7	245669		1975	87697.2	83101.7	134601	318374	140428	5650.15	33050.9	1975	2.61963e+06	2.62275e+06	5.28511e+06	1.00699e+07	3.67409e+06	209452	3.18681e+06
1976	2.05075e+06	2.06214e+06	4.0911e+06	8.1819e+06	2.93214e+06	160067	2.78838e+06		1976	381195	360304	635175	1.37727e+06	463544	28685.8	180002		1976	129104	129684	280341	488205	135566	11727.8	220125		1976	92228.1	87265.9	141185	351571	152710	5963.43	34729.8	1976	2.65328e+06	2.63939e+06	5.1478e+06	1.03989e+07	3.68396e+06	206445	3.22324e+06
1977	2.05065e+06	2.04639e+06	3.91746e+06	8.28502e+06	2.8704e+06	154980	2.80352e+06		1977	279681	264389	465295	1.06019e+06	351485	21122	131929		1977	123271	123056	256482	472019	126665	10843.9	211126		1977	101428	95849.6	154931	405676	173642	6580.9	38191.4	1977	2.55503e+06	2.52968e+06	4.79417e+06	1.02229e+07	3.52219e+06	193526	3.18476e+06
1978	1.90591e+06	1.88704e+06	3.48728e+06	7.78811e+06	2.60774e+06	139342	2.62075e+06		1978	258862	244748	430090	1.02831e+06	336323	19619.2	122034		1978	109197	108282	217692	422645	109676	9294.8	187856		1978	81584.6	77018.1	124409	342162	144397	5310.97	30741.9	1978	2.35555e+06	2.31709e+06	4.25948e+06	9.58123e+06	3.19813e+06	173567	2.96138e+06
1979	1.66683e+06	1.63702e+06	2.92195e+06	6.88104e+06	2.2258e+06	117779	2.30604e+06		1979	234162	221435	388640	973738	314626	17810	110372		1979	98263.7	96750.2	187708	383788	96361.5	8086.78	169793		1979	65504.2	61787.8	99768	287912	119848	4277.7	24720.8	1979	2.06476e+06	2.01699e+06	3.59806e+06	8.52648e+06	2.75664e+06	147953	2.61092e+06
1980	1.63958e+06	1.59689e+06	2.75464e+06	6.83061e+06	2.13336e+06	111865	2.28292e+06		1980	198980	188207	329997	865324	276585	15187.5	93821.9		1980	92567.1	90457.2	169459	364241	88526.3	7359.3	160647		1980	57046.1	53778.5	86826.2	262657	107885	3736.65	21580.6	1980	1.98818e+06	1.92934e+06	3.34092e+06	8.32283e+06	2.60636e+06	138148	2.55897e+06
1981	1.38035e+06	1.33296e+06	2.22365e+06	5.79744e+06	1.7472e+06	90847.8	1.9349e+06		1981	189372	179164	313921	860463	272410	14504.8	89369.2		1981	81289.5	78807.1	142644	321757	75723.7	6238.01	141681		1981	59126.1	55720.1	89979.5	285070	115570	3884.1	22441.2	1981	1.71013e+06	1.64665e+06	2.7702e+06	7.26473e+06	2.21091e+06	115475	2.18839e+06
1982	1.23781e+06	1.18488e+06	1.913e+06	5.23602e+06	1.5216e+06	78508.3	1.74727e+06		1982	152294	144125	252429	722414	226792	11705.6	71974.1		1982	69437.4	66755.5	116831	276058	62926.2	5138.79	121534		1982	59475.9	56043.6	90551.3	300184	120143	3917.85	22669.3	1982	1.51901e+06	1.4518e+06	2.37281e+06	6.53468e+06	1.93147e+06	99270.5	1.96345e+06
1983	1.43133e+06	1.35788e+06	2.12355e+06	6.09235e+06	1.70581e+06	87397.4	2.03519e+06		1983	162940	154250	270145	806287	251285	12567.5	77162.4		1983	69358.7	66096.6	111941	276562	61068.6	4945.81	121898		1983	80421.1	75789.7	122567	424800	167873	5311.46	30811.8	1983	1.74405e+06	1.65402e+06	2.62821e+06	7.6e+06	2.18603e+06	110222	2.26507e+06
1984	1.51472e+06	1.42387e+06	2.15895e+06	6.48168e+06	1.74699e+06	88948.4	2.17008e+06		1984	167712	158823	278238	865125	267947	12980.5	79634.3		1984	82433.7	77838.2	127684	329212	70423.4	5658.67	145463		1984	84853.5	79996.1	129539	468993	183020	5618.13	32711.3	1984	1.84972e+06	1.74053e+06	2.69441e+06	8.14502e+06	2.26838e+06	113206	2.42789e+06
1985	1.42877e+06	1.33054e+06	1.95806e+06	6.14112e+06	1.59178e+06	80602.5	2.06297e+06		1985	160496	152050	266552	862488	265736	12465.1	76462.8		1985	76147.7	71216.5	113265	304170	63031	5027.24	134901		1985	85474.2	80630.2	130791	494253	190478	5672.55	33188.9	1985	1.75089e+06	1.63443e+06	2.46867e+06	7.80203e+06	2.11103e+06	103767	2.30752e+06
1986	1.52089e+06	1.40284e+06	2.00602e+06	6.56065e+06	1.63363e+06	82335.7	2.21373e+06		1986	159101	150793	264637	890182	273097	12399.4	76105.3		1986	79997.1	74073.6	114350	319188	64064.8	5074.42	142263		1986	79183.9	74759.8	121532	478985	182303	5266.78	31002	1986	1.83917e+06	1.70247e+06	2.50654e+06	8.24901e+06	2.15309e+06	105076	2.4631e+06
1987	1.62443e+06	1.4838e+06	2.06433e+06	7.02673e+06	1.67891e+06	84295.5	2.38413e+06		1987	147959	140300	246599	861457	263395	11570.9	71116.2		1987	89137.2	81685.5	122547	354797	68957.4	5427.15	159106		1987	74406.8	70326.4	114629	470799	176964	4959.41	29406.3	1987	1.93593e+06	1.77611e+06	2.54811e+06	8.71378e+06	2.18823e+06	106253	2.64376e+06
1988	1.76072e+06	1.59239e+06	2.15838e+06	7.63112e+06	1.74739e+06	87477.8	2.60629e+06		1988	149361	141704	249563	904484	275859	11720.9	72192		1988	107290	97269.6	142003	425478	80048.4	6263.52	192196		1988	73724.6	69774.9	114092	487929	181121	4923.61	29445	1988	2.0911e+06	1.90114e+06	2.66404e+06	9.44901e+06	2.28442e+06	110386	2.90012e+06
1989	1.57403e+06	1.40922e+06	1.8637e+06	6.82964e+06	1.49671e+06	74781.4	2.3504e+06		1989	161466	153276	270617	1.01654e+06	309518	12714.6	78545.2		1989	112448	100817	143431	443730	80773.1	6287.52	202132		1989	74619.9	70734.1	116091	516552	189352	4992.59	30153.5	1989	1.92256e+06	1.73404e+06	2.39384e+06	8.80646e+06	2.07636e+06	98776.1	2.66123e+06
1990	1.45529e+06	1.28957e+06	1.6667e+06	6.31637e+06	1.32287e+06	66032.7	2.19266e+06		1990	157983	150064	265747	1.03361e+06	314441	12483.3	77412.6		1990	102471	90822.3	126114	401870	70737.4	5481.61	184811		1990	56266.5	53434	88075	407407	147467	3771.1	23032.7	1990	1.77201e+06	1.58389e+06	2.14663e+06	8.15926e+06	1.85551e+06	87768.6	2.47791e+06
1991	1.38933e+06	1.2183e+06	1.54143e+06	6.02693e+06	1.20439e+06	60127.2	2.11254e+06		1991	147874	140557	249804	1.00504e+06	305716	11724.9	73055		1991	100775	88265.3	119823	392300	66724.4	5151.32	182330		1991	47915.8	45598.4	75529.8	362905	129698	3216.57	19894.4	1991	1.6859e+06	1.49272e+06	1.98659e+06	7.78717e+06	1.70653e+06	80220	2.38782e+06
1992	1.30861e+06	1.13537e+06	1.40882e+06	5.66903e+06	1.0791e+06	53943	2.00849e+06		1992	133907	127375	227324	945142	287680	10654.2	66762.5		1992	96933.6	83868.9	111505	374105	61430.7	4728.87	175911		1992	52102.2	49697.7	82779.3	412789	145647	3502.8	21969.7	1992	1.59155e+06	1.39631e+06	1.83043e+06	7.40106e+06	1.57386e+06	72828.9	2.27314e+06
1993	1.36223e+06	1.16918e+06	1.42556e+06	5.88828e+06	1.06566e+06	53408.8	2.11083e+06		1993	155133	147684	264837	1.13677e+06	346475	12386	78132.8		1993	94928.5	81106.6	105805	362779	57452.9	4413.94	172768		1993	47851.3	45760.6	76699.8	396602	138138	3221.44	20519	1993	1.66014e+06	1.44373e+06	1.8729e+06	7.78443e+06	1.60773e+06	73430.2	2.38225e+06
1994	1.44348e+06	1.22538e+06	1.4711e+06	6.22026e+06	1.06817e+06	53747.2	2.25856e+06		1994	155355	148023	266899	1.18157e+06	360864	12446.9	79122.8		1994	98948.5	83454.2	107029	373986	57052.8	4379.09	180574		1994	45051	43204.5	72922.8	390653	134303	3036.76	19672.3	1994	1.74284e+06	1.50006e+06	1.91795e+06	8.16648e+06	1.62039e+06	73609.9	2.53793e+06
1995	1.4864e+06	1.24782e+06	1.47812e+06	6.37977e+06	1.03724e+06	52477.5	2.34879e+06		1995	170804	162896	295530	1.34805e+06	412823	13732.6	88062.3		1995	93895.7	78147	98733	350561	51442.3	3949.38	171791		1995	53261.4	51235.8	87150.9	483248	163964	3594.36	23716.9	1995	1.80436e+06	1.5401e+06	1.95953e+06	8.56163e+06	1.66547e+06	73753.9	2.63236e+06
1996	1.4295e+06	1.18654e+06	1.38989e+06	6.10555e+06	937534	47773.3	2.28165e+06		1996	144537	137985	252066	1.18352e+06	363657	11661.7	75521.2		1996	106893	87759.6	109462	393740	55485.7	4266.44	196038		1996	52725.1	50888.9	87304.4	500604	167611	3561.94	23976.2	1996	1.73365e+06	1.46317e+06	1.83873e+06	8.18341e+06	1.52429e+06	67263.4	2.57718e+06
1997	1.45331e+06	1.19251e+06	1.3845e+06	6.171e+06	892556	45893.4	2.34337e+06		1997	149469	142849	262957	1.2696e+06	391668	12102.3	79238.9		1997	95273.9	77134	95189.2	345810	46707.1	3602.46	175116		1997	61122.9	59205.9	102532	607375	200651	4133.24	28426.6	1997	1.75917e+06	1.4717e+06	1.84518e+06	8.39378e+06	1.53158e+06	65731.4	2.62615e+06
1998	1.40652e+06	1.14074e+06	1.31571e+06	5.93161e+06	805690	41889.9	2.29145e+06		1998	131846	126156	234201	1.16159e+06	360003	10713.6	71002.5		1998	85722.7	68414.4	83722.1	306211	39551.2	3065.22	157883		1998	59093.7	57460.2	100538	614652	200326	3999.49	28149.6	1998	1.68318e+06	1.39277e+06	1.73417e+06	8.01407e+06	1.40557e+06	59668.2	2.54848e+06
1999	1.4105e+06	1.1305e+06	1.29844e+06	5.90173e+06	750285	39539	2.32204e+06		1999	147822	141622	265370	1.35068e+06	420793	12055	80964.9		1999	88130.6	69312.7	84304.9	309429	38119.4	2974.44	162620		1999	54306.2	53021.5	93817.8	591342	190114	3678.34	26537.4	1999	1.70076e+06	1.39445e+06	1.74193e+06	8.15318e+06	1.39931e+06	58246.7	2.59217e+06
2000	1.37133e+06	1.08597e+06	1.24508e+06	5.68671e+06	674063	36102.8	2.28152e+06		2000	133201	127789	241901	1.2622e+06	395513	10902.1	74297		2000	96301.1	74611.4	90407.2	331902	38876.9	3061.47	177996		2000	63576.1	62342.7	111664	724862	229852	4309.22	31920.1	2000	1.6644e+06	1.35072e+06	1.68906e+06	8.00567e+06	1.33831e+06	54375.6	2.56573e+06
2001	1.33433e+06	1.04387e+06	1.1976e+06	5.47783e+06	602758	32915	2.24378e+06		2001	133747	128503	245968	1.31431e+06	414477	10987	76071.6		2001	96655.6	73747.2	89231.1	326569	36237.3	2887.88	178919		2001	74105.5	73003.7	132496	884832	276706	5026.03	38289.3	2001	1.63884e+06	1.31912e+06	1.66529e+06	8.00354e+06	1.33018e+06	51816	2.53706e+06
2002	1.43097e+06	1.10571e+06	1.27247e+06	5.80882e+06	590364	32990.6	2.43234e+06		2002	134507	129439	250766	1.37074e+06	435287	11090.6	78116.9		2002	93796.5	70454	85323	310250	32470.8	2627.48	173854		2002	73230.5	72494.3	133461	915870	282427	4969.42	39002	2002	1.7325e+06	1.37809e+06	1.74202e+06	8.40568e+06	1.34055e+06	51678	2.72332e+06
2003	1.5303e+06	1.16771e+06	1.35127e+06	6.13491e+06	572486	32882.5	2.6296e+06		2003	133699	128882	252967	1.41302e+06	452096	11065.4	79394.2		2003	96329	71208.9	86515.5	311492	30587.7	2523.25	178750		2003	74685.7	74316	138931	978586	297535	5070.63	41069.9	2003	1.83502e+06	1.44212e+06	1.82968e+06	8.83801e+06	1.3527e+06	51541.8	2.92882e+06
2004	1.66244e+06	1.25247e+06	1.46089e+06	6.57327e+06	559244	33192.9	2.8881e+06		2004	137204	132506	263771	1.50395e+06	485084	11399	83427.8		2004	105201	76509	93469.2	332081	30400.9	2569.24	195395		2004	77928.5	77963.9	148176	1.06997e+06	320725	5293.07	44321.1	2004	1.98278e+06	1.53945e+06	1.96631e+06	9.47927e+06	1.39545e+06	52454.2	3.21125e+06
2005	1.74803e+06	1.30003e+06	1.53204e+06	6.80746e+06	523566	32322.7	3.07044e+06		2005	134987	130625	263999	1.53479e+06	499311	11258.3	84168.6		2005	93311.9	66742.8	82174.2	287103	24311.2	2117.89	173442		2005	64388.9	64785.8	125327	926627	273806	4375.08	37940.5	2005	2.04071e+06	1.56218e+06	2.00354e+06	9.55599e+06	1.32099e+06	50074	3.36599e+06
2006	1.792e+06	1.31534e+06	1.56976e+06	6.86342e+06	472207	30573.6	3.18277e+06		2006	131041	127078	261046	1.54567e+06	507472	10972.3	83912.9		2006	106289	74745.8	92949.5	318257	24682.6	2233.92	197672		2006	66750	67564.1	133198	1.0071e+06	293323	4537.03	40821	2006	2.09608e+06	1.58473e+06	2.05695e+06	9.73445e+06	1.29768e+06	48316.9	3.50518e+06
2007	2.00041e+06	1.44887e+06	1.75499e+06	7.52332e+06	456928	31359.8	3.59276e+06		2007	129383	125761	262885	1.58352e+06	524958	10877.2	85218.3		2007	117668	81330	102368	342313	24010.1	2280.86	218913		2007	53712	54708.9	110055	849850	243956	3651.94	34152.4	2007	2.30117e+06	1.71067e+06	2.2303e+06	1.0299e+07	1.24985e+06	48169.8	3.93104e+06
2008	1.70403e+06	1.21761e+06	1.50021e+06	6.28253e+06	331078	24431	3.09492e+06		2008	107352	104608	222779	1.3636e+06	456697	9062.18	72842		2008	93833.4	63723.7	81350.9	264752	16517.7	1669.81	174599		2008	43794.5	44901.3	92289.5	726890	205634	2978.47	29005.3	2008	1.94901e+06	1.43084e+06	1.89663e+06	8.63778e+06	1.00993e+06	38141.5	3.37137e+06
2009	1.46307e+06	1.03115e+06	1.29502e+06	5.27857e+06	235802	19081.6	2.68731e+06		2009	83274.3	81364.1	176755	1.09807e+06	371744	7059.16	58303.5		2009	80987.7	54022.3	70086.6	221218	12001	1316.2	150692		2009	35383.5	36528.2	76817	616269	171799	2407.08	24455.1	2009	1.66271e+06	1.20307e+06	1.61868e+06	7.21412e+06	791346	29864.1	2.92076e+06
2010	1.27076e+06	883191	1.13289e+06	4.47799e+06	164046	14983.9	2.36055e+06		2010	77355.6	75801.3	168189	1.05923e+06	362666	6585.67	55976.6		2010	72654.9	47586.8	62858.6	191751	8755.86	1071.84	135156		2010	28213.9	29337.1	63211.3	515830	141692	1919.85	20387.2	2010	1.44898e+06	1.03592e+06	1.42715e+06	6.2448e+06	677160	24561.3	2.57207e+06
2011	1.38115e+06	946388	1.24227e+06	4.74395e+06	135484	14618.2	2.59479e+06		2011	67474.2	66326.6	150509	959770	332523	5769.8	50549.6		2011	74442.4	47859.6	64481.4	189435	6925.7	989.855	138422		2011	23385.1	24500.1	54165.7	448980	121513	1591.7	17700.9	2011	1.54645e+06	1.08507e+06	1.51143e+06	6.34214e+06	596445	22969.5	2.80146e+06
2012	1.42465e+06	962209	1.29485e+06	4.75908e+06	97169.5	13419.8	2.70698e+06		2012	64079.7	63204.4	146881	947239	332264	5504.44	49787.4		2012	72535.3	45759.6	62988.9	177578	4769.72	862.041	134791		2012	21807.1	23027.9	52316.8	439859	117284	1484.74	17324.6	2012	1.58307e+06	1.0942e+06	1.55704e+06	6.32376e+06	551487	21271	2.90889e+06
2013	1.37268e+06	913613	1.26258e+06	4.44899e+06	54159.8	11390.3	2.63798e+06		2013	62301.7	61677.4	146994	957522	340232	5376.77	50291.1		2013	76120.3	47105.8	66352.2	178852	2945.17	800.364	141337		2013	20592.7	21926	51268.3	436577	114680	1402.53	17205	2013	1.53169e+06	1.04432e+06	1.5272e+06	6.02194e+06	512017	18969.9	2.84682e+06
2014	1.50403e+06	986224	1.40193e+06	4.71729e+06	17850.1	10855.6	2.9234e+06		2014	61975.5	61599.8	150776	990844	356838	5374.5	52071.3		2014	85183.2	51692.1	74617.9	191589	1008.99	782.528	158003		2014	20298.6	21800.8	52548.2	452553	117103	1383.04	17871.7	2014	1.67149e+06	1.12132e+06	1.67987e+06	6.35228e+06	492801	18395.7	3.15135e+06

## Sheet: Data Sheet 6
Year	Norway	UK (estimated)	Sweden	Netherlands	UK (observed)
1950	311.749	930.113	380	1709.41
1951	321.066	1023.29	387.5	1731.48
1952	330.264	867.772	395	1752.56
1953	339.344	704.879	402.5	1772.66
1954	348.304	682.123	410	1791.8
1955	357.145	775.682	417.5	1810.01
1956	365.867	851.2	425	1827.3
1957	374.471	805.497	432.5	1843.71
1958	382.955	878.319	440	1859.26
1959	391.32	962.205	447.5	1873.99
1960	399.567	970.636	455	1887.91
1961	407.694	1081.16	456.5	1901.07
1962	415.703	1047.84	458	1913.5
1963	423.592	1040.1	459.5	1925.22
1964	431.363	1022.16	461	1936.26
1965	439.014	1055.58	462.5	1946.66
1966	446.547	975.96	464	1956.45
1967	453.961	970.615	465.5	1965.66
1968	461.255	969.717	467	1974.32
1969	468.431	1044.88	468.5	1982.45
1970	475.488	1033.08	470	1990.09
1971	482.426	1069.65	454.5	1997.25
1972	489.245	1201.51	439	2003.97
1973	495.945	1398.55	423.5	2010.27	710.4
1974	502.526	1383.11	408	2016.18
1975	508.988	1129.84	392.5	2021.71
1976	515.331	1034.96	377	2026.89
1977	521.555	1006.06	361.5	2031.73
1978	527.66	1117.39	346	2036.27
1979	533.646	1327.01	330.5	2040.52
1980	539.513	1301.77	315	2044.48
1981	545.262	1352.27	317.25	2048.2
1982	550.891	1579.04	319.5	2051.66
1983	556.401	1457.42	321.75	2054.91
1984	561.793	1408.5	324	2057.93
1985	567.065	1497	326.25	2060.76
1986	572.219	1434.59	328.5	2063.41
1987	577.253	1495.96	330.75	2065.87
1988	582.169	1754.14	333	2068.18
1989	586.965	2115.45	335.25	2070.33
1990	591.643	1895.88	337.5	2072.33
1991	596.201	1629.4	339.75	2074.21
1992	600.641	1656.64	342	2075.95
1993	604.962	1572.64	344.25	2077.59
1994	609.164	1688.24	346.5	2079.11
1995	613.247	1533.43	348.75	2080.52
1996	617.21	1317.07	351	2081.85
1997	621.055	1314.83	353.25	2083.08
1998	624.781	1353.96	355.5	2084.23
1999	628.388	1384.6	357.75	2085.31
2000	631.876	1133.91	360	2086.31
2001	635.245	1169.39	362.25	2087.24
2002	638.496	1143.7	364.5	2088.11
2003	641.627	1104.61	366.75	2088.92
2004	644.639	1053.61	369	2089.68
2005	647.532	985.76	371.25	2090.38	445
2006	650.306	991.217	373.5	2091.04
2007	652.962	993.054	375.75	2091.65
2008	655.498	1013.38	378	2092.22
2009	657.916	949.142	380.25	2092.75
2010	660.214	1097.46	382.5	2093.25
2011	662.394	873.258	384.75	2093.71
2012	664.454	1040.87	387	2094.14
2013	666.396	1199.81	389.25	2094.54
2014	668.218	1321.74	391.5	2094.91

## Sheet: Data Sheet 7
Year	End terrace (ENDWC)	Mid terrace (ENDWC)	Semi detached (ENDWC)	Detached (ENDWC)	bungalow (ENDWC)	coverted flat (ENDWC)	purpose built flat (ENDWC)	End terrace (SCDWC)	Mid terrace (SCDWC)	Semi detached (SCDWC)	Detached (SCDWC)	Tenement (SCDWC)	Coverted flat (SCDWC)	Purpose built flat (SCDWC)	End terrace (WADWC)	Mid terrace (WADWC)	Semi detached (WADWC)	Detached (WADWC)	Tenement (WADWC)	Coverted flat (WADWC)	Purpose built flat (WADWC)	End terrace (NIDWC)	Mid terrace (NIDWC)	Semi detached (NIDWC)	Detached (NIDWC)	Tenement (NIDWC)	Coverted flat (NIDWC)	Purpose built flat (NIDWC)
1950	1.1534e+09	1.25392e+09	6.5094e+09	2.81937e+08	1.75375e+09	1.57055e+08	1.56062e+09	3.92679e+08	3.72257e+08	7.04701e+08	3.56407e+06	2.29009e+08	2.66677e+07	2.0499e+08	6.33498e+07	6.26407e+07	3.5762e+08	1.24854e+07	8.3315e+07	1.04039e+07	9.84796e+07	1.11054e+08	1.1575e+08	1.99245e+08	1.25014e+06	7.48791e+07	6.25323e+06	5.04599e+07
1951	1.25476e+09	1.36759e+09	6.84485e+09	6.414e+08	1.93593e+09	1.68772e+08	1.68907e+09	3.77703e+08	3.57963e+08	6.75937e+08	4.60292e+07	2.25546e+08	2.57631e+07	1.96271e+08	7.43042e+07	7.40388e+07	4.07626e+08	3.0943e+07	9.79934e+07	1.20229e+07	1.15697e+08	1.15913e+08	1.20162e+08	2.06273e+08	1.73394e+07	8.09773e+07	6.57241e+06	5.20732e+07
1952	1.28562e+09	1.40402e+09	6.77482e+09	9.84062e+08	2.00993e+09	1.70697e+08	1.72246e+09	4.25421e+08	4.0308e+08	7.59157e+08	1.00453e+08	2.60223e+08	2.91439e+07	2.20048e+08	7.89297e+07	7.92047e+07	4.20475e+08	4.97225e+07	1.04287e+08	1.25755e+07	1.23126e+08	1.15076e+08	1.18661e+08	2.03134e+08	3.30162e+07	8.32896e+07	6.56968e+06	5.11224e+07
1953	1.39286e+09	1.52338e+09	7.0864e+09	1.40334e+09	2.20357e+09	1.82434e+08	1.85818e+09	4.34494e+08	4.11572e+08	7.73082e+08	1.52906e+08	2.7235e+08	2.98937e+07	2.23697e+08	8.28754e+07	8.37018e+07	4.28411e+08	6.94087e+07	1.09605e+08	1.2994e+07	1.29545e+08	8.7548e+07	8.9805e+07	1.5331e+08	3.70639e+07	6.56455e+07	5.03181e+06	3.84686e+07
1954	1.49325e+09	1.63474e+09	7.33045e+09	1.84821e+09	2.38731e+09	1.92804e+08	1.98447e+09	4.06361e+08	3.8483e+08	7.20872e+08	1.90705e+08	2.61121e+08	2.80775e+07	2.08237e+08	8.16552e+07	8.2952e+07	4.09294e+08	8.48347e+07	1.07995e+08	1.25913e+07	1.27925e+08	6.533e+07	6.66716e+07	1.13502e+08	3.65249e+07	5.07452e+07	3.77968e+06	2.83986e+07
1955	1.55966e+09	1.70821e+09	7.38346e+09	2.27135e+09	2.51636e+09	1.9838e+08	2.06568e+09	3.98672e+08	3.7746e+08	7.05087e+08	2.34553e+08	2.62723e+08	2.76628e+07	2.0334e+08	7.81745e+07	7.98331e+07	3.79682e+08	9.64775e+07	1.03303e+08	1.18485e+07	1.22772e+08	8.09635e+07	8.22123e+07	1.3957e+08	5.6209e+07	6.5143e+07	4.71455e+06	3.48254e+07
1956	1.61934e+09	1.7735e+09	7.38847e+09	2.69401e+09	2.63307e+09	2.02762e+08	2.13837e+09	4.02946e+08	3.8142e+08	7.10451e+08	2.85726e+08	2.72426e+08	2.80766e+07	2.04558e+08	8.14687e+07	8.35844e+07	3.8312e+08	1.15927e+08	1.07466e+08	1.21292e+07	1.28283e+08	8.72945e+07	8.82069e+07	1.4933e+08	7.23699e+07	7.27499e+07	5.11554e+06	3.71639e+07
1957	1.53089e+09	1.67576e+09	6.72832e+09	2.84756e+09	2.50533e+09	1.88567e+08	2.01647e+09	3.81413e+08	3.60961e+08	6.7039e+08	3.17198e+08	2.64656e+08	2.66868e+07	1.92721e+08	7.51651e+07	7.74307e+07	3.42011e+08	1.20664e+08	9.88869e+07	1.09859e+07	1.18691e+08	7.46204e+07	7.50401e+07	1.26686e+08	7.19049e+07	6.44084e+07	4.40009e+06	3.1451e+07
1958	1.50284e+09	1.64343e+09	6.35894e+09	3.07468e+09	2.47198e+09	1.81968e+08	1.97539e+09	4.0564e+08	3.83811e+08	7.10729e+08	3.8781e+08	2.88985e+08	2.84989e+07	2.04008e+08	6.93842e+07	7.17244e+07	3.05252e+08	1.23582e+08	9.09567e+07	9.94917e+06	1.09892e+08	6.05859e+07	6.06429e+07	1.02096e+08	6.6534e+07	5.41583e+07	3.59432e+06	2.52878e+07
1959	1.69763e+09	1.85377e+09	6.91187e+09	3.77136e+09	2.8029e+09	2.01919e+08	2.22776e+09	3.70727e+08	3.50711e+08	6.47499e+08	4.0127e+08	2.71267e+08	2.61525e+07	1.85587e+08	7.92273e+07	8.21379e+07	3.36779e+08	1.54516e+08	1.03398e+08	1.11388e+07	1.25881e+08	6.43692e+07	6.41382e+07	1.07683e+08	7.93632e+07	5.95868e+07	3.84157e+06	2.66141e+07
1960	1.84791e+09	2.01408e+09	7.23587e+09	4.41158e+09	3.05843e+09	2.15749e+08	2.42205e+09	3.85263e+08	3.64397e+08	6.70745e+08	4.66453e+08	2.89645e+08	2.72881e+07	1.9198e+08	8.61865e+07	8.95619e+07	3.53739e+08	1.82088e+08	1.11878e+08	1.18731e+07	1.37396e+08	8.37819e+07	8.31147e+07	1.3916e+08	1.14623e+08	8.03098e+07	5.0293e+06	3.43253e+07
1961	2.04639e+09	2.22525e+09	7.70259e+09	5.20526e+09	3.39059e+09	2.34354e+08	2.68012e+09	4.01868e+08	3.8004e+08	6.97423e+08	5.38976e+08	3.1054e+08	2.85786e+07	1.99348e+08	1.05467e+08	1.09793e+08	4.1768e+08	2.3924e+08	1.36052e+08	1.42276e+07	1.68721e+08	1.00799e+08	9.95715e+07	1.66261e+08	1.51594e+08	1.00044e+08	6.08533e+06	4.09355e+07
1962	2.0413e+09	2.21366e+09	7.38217e+09	5.49276e+09	3.38129e+09	2.2913e+08	2.67255e+09	3.76306e+08	3.55813e+08	6.50982e+08	5.54596e+08	2.98989e+08	2.68675e+07	1.85837e+08	1.22081e+08	1.27244e+08	4.66197e+08	2.95093e+08	1.56358e+08	1.61164e+07	1.9601e+08	1.10808e+08	1.0901e+08	1.81533e+08	1.81794e+08	1.13864e+08	6.72683e+06	4.46221e+07
1963	1.97414e+09	2.13412e+09	6.85619e+09	5.58534e+09	3.26482e+09	2.17029e+08	2.58485e+09	3.87223e+08	3.66085e+08	6.67744e+08	6.22909e+08	3.16454e+08	2.77562e+07	1.90393e+08	1.13394e+08	1.1827e+08	4.17281e+08	2.90192e+08	1.44065e+08	1.46399e+07	1.8275e+08	1.15885e+08	1.13554e+08	1.88599e+08	2.06093e+08	1.23279e+08	7.07318e+06	4.62916e+07
1964	2.40403e+09	2.58968e+09	8.01459e+09	7.11428e+09	3.96411e+09	2.58653e+08	3.14935e+09	4.9267e+08	4.65718e+08	8.46909e+08	8.60136e+08	4.14278e+08	3.54531e+07	2.41207e+08	1.50825e+08	1.57334e+08	5.34517e+08	4.06355e+08	1.89908e+08	1.90313e+07	2.44026e+08	1.20153e+08	1.1729e+08	1.94298e+08	2.30412e+08	1.32315e+08	7.37252e+06	4.76306e+07
1965	2.56613e+09	2.75351e+09	8.20873e+09	7.90719e+09	4.21332e+09	2.69998e+08	3.36486e+09	4.7245e+08	4.46556e+08	8.09625e+08	8.90813e+08	4.08913e+08	3.41302e+07	2.30348e+08	1.61062e+08	1.67947e+08	5.49373e+08	4.54574e+08	2.008e+08	1.98493e+07	2.61637e+08	1.14151e+08	1.11027e+08	1.83456e+08	2.34987e+08	1.30116e+08	7.04035e+06	4.49255e+07
1966	2.39558e+09	2.55953e+09	7.35012e+09	7.65572e+09	3.91119e+09	2.46299e+08	3.14547e+09	4.40375e+08	4.162e+08	7.52348e+08	8.92948e+08	3.92453e+08	3.19358e+07	2.13849e+08	1.48474e+08	1.5468e+08	4.87148e+08	4.37047e+08	1.83115e+08	1.78597e+07	2.42184e+08	1.21434e+08	1.17703e+08	1.94004e+08	2.67327e+08	1.43262e+08	7.52707e+06	4.74687e+07
1967	2.48003e+09	2.63748e+09	7.29573e+09	8.19116e+09	4.02085e+09	2.48964e+08	3.26209e+09	4.95179e+08	4.6796e+08	8.43436e+08	1.07578e+09	4.54533e+08	3.60476e+07	2.39536e+08	1.5463e+08	1.60862e+08	4.87751e+08	4.72843e+08	1.88481e+08	1.81424e+07	2.53288e+08	1.25068e+08	1.20827e+08	1.98675e+08	2.93476e+08	1.52699e+08	7.79004e+06	4.85816e+07
1968	2.55641e+09	2.7052e+09	7.20825e+09	8.69939e+09	4.1102e+09	2.50379e+08	3.36985e+09	4.92243e+08	4.65158e+08	8.3598e+08	1.14204e+09	4.65554e+08	3.597e+07	2.3724e+08	1.47857e+08	1.53518e+08	4.48142e+08	4.68016e+08	1.77956e+08	1.69093e+07	2.43235e+08	1.33649e+08	1.28717e+08	2.11158e+08	3.33354e+08	1.68857e+08	8.36391e+06	5.16142e+07
1969	2.40607e+09	2.5326e+09	6.50082e+09	8.41274e+09	3.83104e+09	2.29729e+08	3.17982e+09	5.2895e+08	4.99824e+08	8.95765e+08	1.30675e+09	5.15631e+08	3.8798e+07	2.54044e+08	1.44611e+08	1.49781e+08	4.20951e+08	4.72282e+08	1.71695e+08	1.61091e+07	2.38935e+08	1.34196e+08	1.28868e+08	2.10936e+08	3.54935e+08	1.75436e+08	8.43674e+06	5.15526e+07
1970	2.27103e+09	2.377e+09	5.87801e+09	8.13851e+09	3.57606e+09	2.11211e+08	3.01021e+09	5.1967e+08	4.91043e+08	8.77637e+08	1.36352e+09	5.22315e+08	3.826e+07	2.48772e+08	1.28706e+08	1.32916e+08	3.59655e+08	4.32401e+08	1.506e+08	1.39557e+07	2.13597e+08	1.33344e+08	1.27702e+08	2.08585e+08	3.73203e+08	1.80358e+08	8.42046e+06	5.09835e+07
1971	2.38517e+09	2.48164e+09	5.91268e+09	8.74111e+09	3.70911e+09	2.15897e+08	3.17207e+09	4.99602e+08	4.72079e+08	8.4153e+08	1.38902e+09	5.17912e+08	3.69192e+07	2.38443e+08	1.30987e+08	1.34808e+08	3.51229e+08	4.51448e+08	1.50906e+08	1.38152e+07	2.18353e+08	1.59123e+08	1.52005e+08	2.47789e+08	4.70419e+08	2.22659e+08	1.00916e+07	6.05878e+07
1972	2.48971e+09	2.57425e+09	5.91015e+09	9.31199e+09	3.81818e+09	2.19154e+08	3.32341e+09	4.32247e+08	4.08441e+08	7.2626e+08	1.27075e+09	4.62313e+08	3.20596e+07	2.05727e+08	1.44975e+08	1.4862e+08	3.7288e+08	5.11282e+08	1.64284e+08	1.48624e+07	2.42759e+08	1.46515e+08	1.39636e+08	2.27204e+08	4.56811e+08	2.12076e+08	9.3307e+06	5.55897e+07
1973	2.66943e+09	2.74205e+09	6.06738e+09	1.01709e+10	4.03148e+09	2.28311e+08	3.57786e+09	4.63669e+08	4.38149e+08	7.77228e+08	1.43869e+09	5.11835e+08	3.45162e+07	2.20137e+08	1.64976e+08	1.68383e+08	4.06883e+08	5.93949e+08	1.83704e+08	1.64274e+07	2.775e+08	1.514e+08	1.43985e+08	2.33884e+08	4.97159e+08	2.26671e+08	9.68053e+06	5.72759e+07
1974	2.43863e+09	2.48792e+09	5.30685e+09	9.44944e+09	3.62164e+09	2.02485e+08	3.28306e+09	4.24764e+08	4.0141e+08	7.10462e+08	1.38866e+09	4.84097e+08	3.17352e+07	2.01231e+08	1.3611e+08	1.38247e+08	3.21804e+08	4.99133e+08	1.48779e+08	1.31545e+07	2.29984e+08	1.39831e+08	1.32728e+08	2.1527e+08	4.83039e+08	2.16517e+08	8.97548e+06	5.27805e+07
1975	2.28478e+09	2.31445e+09	4.76035e+09	8.98985e+09	3.33181e+09	1.84015e+08	3.09068e+09	4.1238e+08	3.89739e+08	6.88372e+08	1.41829e+09	4.85389e+08	3.09214e+07	1.9501e+08	1.63529e+08	1.65216e+08	3.70557e+08	6.09561e+08	1.7529e+08	1.53282e+07	2.77567e+08	9.90842e+07	9.3892e+07	1.52078e+08	3.59714e+08	1.58662e+08	6.38379e+06	3.73423e+07
1976	2.12245e+09	2.13424e+09	4.23413e+09	8.46795e+09	3.03465e+09	1.65664e+08	2.88587e+09	3.94522e+08	3.72901e+08	6.57382e+08	1.42542e+09	4.79751e+08	2.96887e+07	1.86296e+08	1.33617e+08	1.34218e+08	2.90142e+08	5.05273e+08	1.40306e+08	1.21378e+07	2.27821e+08	9.54526e+07	9.03168e+07	1.46121e+08	3.63862e+08	1.58049e+08	6.17192e+06	3.5944e+07
1977	2.06308e+09	2.05879e+09	3.94121e+09	8.33525e+09	2.8878e+09	1.55919e+08	2.82051e+09	2.81377e+08	2.65992e+08	4.68116e+08	1.06661e+09	3.53615e+08	2.125e+07	1.32729e+08	1.24019e+08	1.23802e+08	2.58037e+08	4.7488e+08	1.27433e+08	1.09096e+07	2.12406e+08	1.02042e+08	9.64306e+07	1.55871e+08	4.08136e+08	1.74694e+08	6.6208e+06	3.84229e+07
1978	2.12964e+09	2.10856e+09	3.89665e+09	8.70235e+09	2.91386e+09	1.55699e+08	2.9284e+09	2.8925e+08	2.73479e+08	4.80578e+08	1.14903e+09	3.75804e+08	2.19223e+07	1.36359e+08	1.22016e+08	1.20993e+08	2.43247e+08	4.72259e+08	1.22551e+08	1.03859e+07	2.09908e+08	9.11618e+07	8.60592e+07	1.39014e+08	3.82328e+08	1.61348e+08	5.93442e+06	3.43507e+07
1979	2.21191e+09	2.17234e+09	3.87747e+09	9.13125e+09	2.95367e+09	1.56294e+08	3.06015e+09	3.10736e+08	2.93848e+08	5.15732e+08	1.29217e+09	4.17514e+08	2.36341e+07	1.46466e+08	1.30397e+08	1.28389e+08	2.49092e+08	5.09293e+08	1.27873e+08	1.07313e+07	2.25317e+08	8.6925e+07	8.19933e+07	1.32394e+08	3.82064e+08	1.59041e+08	5.67657e+06	3.28049e+07
1980	2.13437e+09	2.07879e+09	3.58592e+09	8.89191e+09	2.77715e+09	1.45623e+08	2.97185e+09	2.59028e+08	2.45004e+08	4.29582e+08	1.12646e+09	3.60052e+08	1.97707e+07	1.22135e+08	1.20502e+08	1.17755e+08	2.20597e+08	4.7416e+08	1.15241e+08	9.58015e+06	2.09126e+08	7.42612e+07	7.00075e+07	1.13028e+08	3.4192e+08	1.40442e+08	4.86427e+06	2.8093e+07
1981	1.8666e+09	1.80252e+09	3.00698e+09	7.8397e+09	2.36269e+09	1.22851e+08	2.61651e+09	2.56082e+08	2.42278e+08	4.24506e+08	1.16358e+09	3.68372e+08	1.96144e+07	1.20851e+08	1.09925e+08	1.06568e+08	1.92893e+08	4.35102e+08	1.02399e+08	8.43546e+06	1.9159e+08	7.99544e+07	7.53486e+07	1.21676e+08	3.85491e+08	1.56282e+08	5.25234e+06	3.03465e+07
1982	1.95455e+09	1.87097e+09	3.02071e+09	8.2679e+09	2.40268e+09	1.23968e+08	2.75902e+09	2.40478e+08	2.27579e+08	3.98596e+08	1.14072e+09	3.58115e+08	1.84836e+07	1.1365e+08	1.09645e+08	1.0541e+08	1.84482e+08	4.35907e+08	9.93632e+07	8.11436e+06	1.91908e+08	9.39149e+07	8.84952e+07	1.42984e+08	4.74004e+08	1.89711e+08	6.18645e+06	3.57958e+07
1983	2.08605e+09	1.97901e+09	3.09491e+09	8.87912e+09	2.48608e+09	1.27375e+08	2.96614e+09	2.37473e+08	2.24807e+08	3.93715e+08	1.1751e+09	3.66228e+08	1.83162e+07	1.12458e+08	1.01085e+08	9.63306e+07	1.63145e+08	4.03068e+08	8.90027e+07	7.20814e+06	1.77657e+08	1.17207e+08	1.10458e+08	1.78632e+08	6.19113e+08	2.44662e+08	7.74103e+06	4.49057e+07
1984	2.13349e+09	2.00552e+09	3.04089e+09	9.12946e+09	2.46064e+09	1.25284e+08	3.05656e+09	2.36223e+08	2.23703e+08	3.91898e+08	1.21853e+09	3.77403e+08	1.82831e+07	1.12165e+08	1.16108e+08	1.09635e+08	1.79843e+08	4.63696e+08	9.91915e+07	7.97025e+06	2.04885e+08	1.19516e+08	1.12675e+08	1.82455e+08	6.60578e+08	2.57784e+08	7.91315e+06	4.6074e+07
1985	2.13886e+09	1.99181e+09	2.93122e+09	9.19325e+09	2.3829e+09	1.20662e+08	3.08826e+09	2.40263e+08	2.27618e+08	3.99028e+08	1.29114e+09	3.97806e+08	1.86602e+07	1.14465e+08	1.13993e+08	1.06611e+08	1.69558e+08	4.55342e+08	9.43574e+07	7.52577e+06	2.01946e+08	1.27955e+08	1.20703e+08	1.95793e+08	7.39896e+08	2.85145e+08	8.49181e+06	4.96838e+07
1986	2.18185e+09	2.0125e+09	2.87782e+09	9.41185e+09	2.34359e+09	1.18118e+08	3.1758e+09	2.28244e+08	2.16326e+08	3.79645e+08	1.27705e+09	3.91782e+08	1.77881e+07	1.0918e+08	1.14763e+08	1.06265e+08	1.64045e+08	4.57904e+08	9.19067e+07	7.27972e+06	2.04089e+08	1.13597e+08	1.0725e+08	1.74349e+08	6.87147e+08	2.6153e+08	7.55568e+06	4.44752e+07
1987	2.43008e+09	2.2197e+09	3.08815e+09	1.05117e+10	2.51158e+09	1.26102e+08	3.56656e+09	2.21341e+08	2.09883e+08	3.68901e+08	1.2887e+09	3.94028e+08	1.73096e+07	1.06387e+08	1.33345e+08	1.22198e+08	1.83325e+08	5.30761e+08	1.03157e+08	8.11879e+06	2.38016e+08	1.11309e+08	1.05205e+08	1.71481e+08	7.04295e+08	2.6473e+08	7.41906e+06	4.39906e+07
1988	3.08855e+09	2.79328e+09	3.7861e+09	1.3386e+10	3.06516e+09	1.53448e+08	4.57179e+09	2.62e+08	2.48568e+08	4.37767e+08	1.58659e+09	4.83896e+08	2.056e+07	1.26635e+08	1.88202e+08	1.70624e+08	2.49094e+08	7.46347e+08	1.40416e+08	1.09871e+07	3.37139e+08	1.29323e+08	1.22395e+08	2.00132e+08	8.55895e+08	3.17712e+08	8.6367e+06	5.16506e+07
1989	3.32978e+09	2.98113e+09	3.94256e+09	1.44478e+10	3.16623e+09	1.58197e+08	4.97216e+09	3.41575e+08	3.24249e+08	5.72478e+08	2.15044e+09	6.5477e+08	2.68971e+07	1.66159e+08	2.37878e+08	2.13274e+08	3.03422e+08	9.38691e+08	1.70872e+08	1.3301e+07	4.27601e+08	1.57855e+08	1.49635e+08	2.45584e+08	1.09274e+09	4.00564e+08	1.05616e+07	6.37883e+07
1990	2.75906e+09	2.44487e+09	3.15986e+09	1.19751e+10	2.50799e+09	1.2519e+08	4.15701e+09	2.99517e+08	2.84503e+08	5.03824e+08	1.9596e+09	5.96141e+08	2.36667e+07	1.46765e+08	1.94273e+08	1.72188e+08	2.39096e+08	7.61896e+08	1.34109e+08	1.03925e+07	3.50379e+08	1.06674e+08	1.01304e+08	1.6698e+08	7.72394e+08	2.7958e+08	7.14955e+06	4.36671e+07
1991	2.26377e+09	1.98509e+09	2.5116e+09	9.82026e+09	1.96243e+09	9.7971e+07	3.44216e+09	2.40945e+08	2.29023e+08	4.0703e+08	1.6376e+09	4.98133e+08	1.91044e+07	1.19035e+08	1.64202e+08	1.43819e+08	1.95238e+08	6.39212e+08	1.0872e+08	8.39354e+06	2.97087e+08	7.80739e+07	7.42978e+07	1.23068e+08	5.91316e+08	2.1133e+08	5.24107e+06	3.24158e+07
1992	2.1679e+09	1.8809e+09	2.33391e+09	9.39155e+09	1.78768e+09	8.93643e+07	3.32736e+09	2.21837e+08	2.11015e+08	3.76594e+08	1.56576e+09	4.76582e+08	1.76503e+07	1.10602e+08	1.60584e+08	1.38941e+08	1.84724e+08	6.19758e+08	1.01769e+08	7.83405e+06	2.91422e+08	8.63147e+07	8.23313e+07	1.37136e+08	6.83844e+08	2.41285e+08	5.80289e+06	3.6396e+07
1993	2.1423e+09	1.83869e+09	2.24189e+09	9.26012e+09	1.6759e+09	8.39926e+07	3.31957e+09	2.43968e+08	2.32253e+08	4.16492e+08	1.78773e+09	5.44879e+08	1.94786e+07	1.22874e+08	1.49288e+08	1.27551e+08	1.66392e+08	5.7052e+08	9.03526e+07	6.94152e+06	2.71701e+08	7.52527e+07	7.19648e+07	1.20621e+08	6.2371e+08	2.17241e+08	5.06616e+06	3.2269e+07
1994	2.43695e+09	2.06874e+09	2.48358e+09	1.05013e+10	1.80334e+09	9.07382e+07	3.81299e+09	2.62277e+08	2.49899e+08	4.50589e+08	1.99478e+09	6.09226e+08	2.10134e+07	1.33578e+08	1.67049e+08	1.40891e+08	1.80692e+08	6.31379e+08	9.63188e+07	7.39297e+06	3.04853e+08	7.60569e+07	7.29397e+07	1.23111e+08	6.59517e+08	2.26736e+08	5.12678e+06	3.32116e+07
1995	2.2793e+09	1.91345e+09	2.2666e+09	9.78296e+09	1.59054e+09	8.04708e+07	3.60172e+09	2.61917e+08	2.4979e+08	4.53175e+08	2.06714e+09	6.33037e+08	2.10581e+07	1.35038e+08	1.43983e+08	1.19833e+08	1.51401e+08	5.37563e+08	7.88833e+07	6.05611e+06	2.6343e+08	8.16728e+07	7.85666e+07	1.3364e+08	7.41029e+08	2.51428e+08	5.51172e+06	3.63683e+07
1996	1.88275e+09	1.56275e+09	1.83059e+09	8.04143e+09	1.2348e+09	6.29207e+07	3.00509e+09	1.90365e+08	1.81736e+08	3.31988e+08	1.55878e+09	4.78962e+08	1.53593e+07	9.94667e+07	1.40786e+08	1.15585e+08	1.44169e+08	5.18583e+08	7.30785e+07	5.61919e+06	2.58196e+08	6.94426e+07	6.70242e+07	1.14986e+08	6.59331e+08	2.20756e+08	4.69132e+06	3.15784e+07
1997	1.91086e+09	1.56795e+09	1.82039e+09	8.11384e+09	1.17356e+09	6.03422e+07	3.08115e+09	1.96526e+08	1.87823e+08	3.45744e+08	1.66932e+09	5.14979e+08	1.59126e+07	1.04186e+08	1.25269e+08	1.01418e+08	1.25158e+08	4.54683e+08	6.14122e+07	4.73664e+06	2.30249e+08	8.03666e+07	7.78459e+07	1.34813e+08	7.98597e+08	2.63823e+08	5.43453e+06	3.73763e+07
1998	1.90437e+09	1.54451e+09	1.78141e+09	8.03115e+09	1.09087e+09	5.67171e+07	3.10252e+09	1.78514e+08	1.70809e+08	3.17098e+08	1.57275e+09	4.87428e+08	1.45057e+07	9.61343e+07	1.16065e+08	9.26302e+07	1.13356e+08	4.14596e+08	5.35507e+07	4.15018e+06	2.13766e+08	8.00103e+07	7.77986e+07	1.36124e+08	8.32212e+08	2.71232e+08	5.41513e+06	3.81133e+07
1999	1.95298e+09	1.56529e+09	1.79782e+09	8.17156e+09	1.03885e+09	5.47459e+07	3.21511e+09	2.04674e+08	1.9609e+08	3.67432e+08	1.87016e+09	5.82632e+08	1.66914e+07	1.12104e+08	1.22026e+08	9.59706e+07	1.16729e+08	4.28436e+08	5.27803e+07	4.11843e+06	2.25165e+08	7.51926e+07	7.34138e+07	1.29901e+08	8.18774e+08	2.63233e+08	5.09304e+06	3.67438e+07
2000	1.55497e+09	1.2314e+09	1.41182e+09	6.44824e+09	7.6433e+08	4.09375e+07	2.58705e+09	1.51038e+08	1.44902e+08	2.74295e+08	1.43122e+09	4.48478e+08	1.23621e+07	8.42464e+07	1.09197e+08	8.4603e+07	1.02514e+08	3.76349e+08	4.4083e+07	3.47145e+06	2.01832e+08	7.20898e+07	7.06913e+07	1.26617e+08	8.21932e+08	2.60632e+08	4.88629e+06	3.61946e+07
2001	1.56035e+09	1.22069e+09	1.40046e+09	6.40573e+09	7.0486e+08	3.84905e+07	2.62386e+09	1.56402e+08	1.5027e+08	2.87632e+08	1.53694e+09	4.84686e+08	1.28481e+07	8.89574e+07	1.13028e+08	8.62392e+07	1.04346e+08	3.81887e+08	4.23756e+07	3.37706e+06	2.09226e+08	8.66582e+07	8.53698e+07	1.5494e+08	1.03471e+09	3.23577e+08	5.87739e+06	4.47752e+07
2002	1.6366e+09	1.2646e+09	1.45532e+09	6.64355e+09	6.752e+08	3.77313e+07	2.78187e+09	1.53836e+08	1.4804e+08	2.86801e+08	1.56771e+09	4.97838e+08	1.26843e+07	8.93423e+07	1.07275e+08	8.05782e+07	9.75839e+07	3.54832e+08	3.71368e+07	3.00505e+06	1.98837e+08	8.37537e+07	8.29117e+07	1.52639e+08	1.04748e+09	3.23012e+08	5.68353e+06	4.46066e+07
2003	1.69039e+09	1.28987e+09	1.49263e+09	6.7767e+09	6.32375e+08	3.63224e+07	2.90469e+09	1.47685e+08	1.42365e+08	2.79431e+08	1.56084e+09	4.99391e+08	1.2223e+07	8.76999e+07	1.06406e+08	7.86582e+07	9.55661e+07	3.44079e+08	3.37875e+07	2.78721e+06	1.97449e+08	8.24987e+07	8.20904e+07	1.53465e+08	1.08096e+09	3.28661e+08	5.60108e+06	4.53663e+07
2004	1.75157e+09	1.31962e+09	1.53921e+09	6.92567e+09	5.89227e+08	3.49725e+07	3.04294e+09	1.4456e+08	1.3961e+08	2.77912e+08	1.58458e+09	5.1109e+08	1.20101e+07	8.79006e+07	1.10841e+08	8.06107e+07	9.84803e+07	3.49884e+08	3.20307e+07	2.70699e+06	2.05871e+08	8.21064e+07	8.21437e+07	1.5612e+08	1.12734e+09	3.3792e+08	5.57684e+06	4.66972e+07
2005	1.72314e+09	1.28151e+09	1.51023e+09	6.71053e+09	5.16111e+08	3.18625e+07	3.02672e+09	1.33065e+08	1.28764e+08	2.60239e+08	1.51294e+09	4.922e+08	1.1098e+07	8.297e+07	9.19831e+07	6.57924e+07	8.1004e+07	2.83015e+08	2.39651e+07	2.08773e+06	1.70973e+08	6.3472e+07	6.38633e+07	1.23542e+08	9.13432e+08	2.69907e+08	4.31278e+06	3.74002e+07
2006	1.77626e+09	1.30379e+09	1.55597e+09	6.80313e+09	4.68059e+08	3.03051e+07	3.15482e+09	1.2989e+08	1.25962e+08	2.58753e+08	1.5321e+09	5.03015e+08	1.0876e+07	8.31759e+07	1.05355e+08	7.40893e+07	9.21331e+07	3.15462e+08	2.44658e+07	2.2143e+06	1.95935e+08	6.61637e+07	6.69707e+07	1.32028e+08	9.98257e+08	2.90747e+08	4.49718e+06	4.04625e+07
2007	1.98652e+09	1.43881e+09	1.7428e+09	7.47107e+09	4.53755e+08	3.1142e+07	3.5678e+09	1.28484e+08	1.24888e+08	2.61059e+08	1.57252e+09	5.21312e+08	1.08016e+07	8.46264e+07	1.16851e+08	8.07651e+07	1.01657e+08	3.39935e+08	2.38434e+07	2.26502e+06	2.17392e+08	5.33389e+07	5.43289e+07	1.0929e+08	8.43947e+08	2.42261e+08	3.62658e+06	3.39152e+07
2008	1.72683e+09	1.2339e+09	1.52028e+09	6.36657e+09	3.35506e+08	2.47578e+07	3.13632e+09	1.08788e+08	1.06007e+08	2.25759e+08	1.38184e+09	4.62806e+08	9.18339e+06	7.38163e+07	9.50885e+07	6.45761e+07	8.2439e+07	2.68294e+08	1.67387e+07	1.69215e+06	1.76934e+08	4.43802e+07	4.55019e+07	9.35239e+07	7.36613e+08	2.08385e+08	3.01831e+06	2.93932e+07
2009	1.38866e+09	9.78709e+08	1.22915e+09	5.01011e+09	2.2381e+08	1.81112e+07	2.55064e+09	7.90391e+07	7.72261e+07	1.67765e+08	1.04222e+09	3.52838e+08	6.70015e+06	5.53383e+07	7.68688e+07	5.12748e+07	6.65221e+07	2.09967e+08	1.13906e+07	1.24926e+06	1.43028e+08	3.3584e+07	3.46704e+07	7.29102e+07	5.84927e+08	1.63062e+08	2.28466e+06	2.32113e+07
2010	1.39461e+09	9.69267e+08	1.2433e+09	4.91441e+09	1.80034e+08	1.64443e+07	2.59061e+09	8.48946e+07	8.31889e+07	1.8458e+08	1.16246e+09	3.98011e+08	7.22751e+06	6.14321e+07	7.97358e+07	5.22246e+07	6.89848e+07	2.10439e+08	9.60921e+06	1.17631e+06	1.48328e+08	3.09636e+07	3.21963e+07	6.93718e+07	5.66103e+08	1.55502e+08	2.10696e+06	2.23742e+07
2011	1.2061e+09	8.26441e+08	1.08482e+09	4.1427e+09	1.18312e+08	1.27654e+07	2.26592e+09	5.89224e+07	5.79203e+07	1.31433e+08	8.38127e+08	2.90378e+08	5.03853e+06	4.41429e+07	6.50074e+07	4.17938e+07	5.63089e+07	1.65426e+08	6.04793e+06	864399	1.20878e+08	2.04212e+07	2.13949e+07	4.73007e+07	3.92075e+08	1.06113e+08	1.38997e+06	1.54575e+07
2012	1.48287e+09	1.00153e+09	1.34777e+09	4.95359e+09	1.01141e+08	1.39683e+07	2.81762e+09	6.66987e+07	6.57876e+07	1.52884e+08	9.85952e+08	3.45843e+08	5.7294e+06	5.18222e+07	7.54998e+07	4.76298e+07	6.55633e+07	1.84835e+08	4.96466e+06	897273	1.403e+08	2.26983e+07	2.3969e+07	5.4455e+07	4.57836e+08	1.22078e+08	1.54542e+06	1.80326e+07
2013	1.64696e+09	1.09616e+09	1.51486e+09	5.33795e+09	6.49816e+07	1.36662e+07	3.16508e+09	7.47504e+07	7.40013e+07	1.76365e+08	1.14885e+09	4.08215e+08	6.45112e+06	6.03399e+07	9.13301e+07	5.65181e+07	7.96102e+07	2.14589e+08	3.53365e+06	960287	1.69577e+08	2.47074e+07	2.63071e+07	6.15124e+07	5.2381e+08	1.37594e+08	1.68278e+06	2.06427e+07
2014	1.98794e+09	1.30353e+09	1.85298e+09	6.23502e+09	2.35931e+07	1.43483e+07	3.86397e+09	8.19154e+07	8.14188e+07	1.99287e+08	1.30964e+09	4.71647e+08	7.10367e+06	6.88246e+07	1.1259e+08	6.83234e+07	9.86253e+07	2.53231e+08	1.33362e+06	1.0343e+06	2.08838e+08	2.68294e+07	2.8815e+07	6.94549e+07	5.98156e+08	1.5478e+08	1.82802e+06	2.36217e+07

## Sheet: Data Sheet 8
Year	England	Scotland	Wales	Northern Ireland		Unit: million
1950	40.7609	5.07072	2.55991	1.30046	49.692
1951	40.9536	5.07317	2.56774	1.30854	49.903
1952	41.1463	5.07562	2.57556	1.31663	50.1141	Source
1953	41.339	5.07807	2.58339	1.32472	50.3252	https://www.ons.gov.uk/peoplepopulationandcommunity/populationandmigration/populationestimates/datasets/populationestimatestimeseriesdataset
1954	41.5317	5.08052	2.59122	1.33281	50.5362
1955	41.7244	5.08297	2.59904	1.3409	50.7473
1956	41.9171	5.08542	2.60687	1.34899	50.9584
1957	42.1098	5.08787	2.61469	1.35708	51.1694
1958	42.3025	5.09032	2.62252	1.36517	51.3805
1959	42.4952	5.09277	2.63035	1.37326	51.5915
1960	42.6879	5.09522	2.63817	1.38134	51.8026
1961	42.8806	5.09767	2.646	1.38943	52.0137
1962	43.0733	5.10012	2.65382	1.39752	52.2247
1963	43.266	5.10257	2.66165	1.40561	52.4358
1964	43.4587	5.10502	2.66947	1.4137	52.6469
1965	43.6514	5.10747	2.6773	1.42179	52.8579
1966	43.8441	5.10992	2.68513	1.42988	53.069
1967	44.0368	5.11237	2.69295	1.43797	53.2801
1968	44.2295	5.11482	2.70078	1.44605	53.4911
1969	44.4222	5.11727	2.7086	1.45414	53.7022
1970	44.6149	5.11972	2.71643	1.46223	53.9133
1971	46.4117	5.2356	2.7403	1.5404	55.928
1972	46.5719	5.2306	2.7552	1.539	56.0967
1973	46.6862	5.2339	2.7728	1.53	56.2229
1974	46.6827	5.2408	2.7852	1.5269	56.2356
1975	46.6744	5.2324	2.7954	1.5235	56.2257
1976	46.6599	5.2334	2.7993	1.5235	56.2161
1977	46.6398	5.2262	2.8006	1.5233	56.1899
1978	46.6382	5.2123	2.8043	1.5232	56.178
1979	46.6981	5.2036	2.8101	1.5283	56.2401
1980	46.7872	5.1939	2.8158	1.5328	56.3297
1981	46.8208	5.1802	2.8135	1.543	56.3575
1982	46.7773	5.1645	2.8043	1.5445	56.2906
1983	46.8137	5.1481	2.8033	1.5506	56.3157
1984	46.9124	5.1389	2.8007	1.5573	56.4093
1985	47.0574	5.1279	2.8034	1.5654	56.5541
1986	47.1876	5.1118	2.8109	1.5735	56.6838
1987	47.3004	5.099	2.8226	1.582	56.804
1988	47.4123	5.0774	2.8412	1.5854	56.9163
1989	47.5527	5.0782	2.8552	1.5904	57.0765
1990	47.6991	5.0813	2.8615	1.5956	57.2375
1991	47.875	5.0833	2.873	1.6073	57.4386
1992	47.998	5.0856	2.8777	1.6233	57.5846
1993	48.1023	5.0925	2.8836	1.6356	57.714
1994	48.2288	5.1022	2.8874	1.6437	57.8621
1995	48.3835	5.1037	2.8885	1.6491	58.0248
1996	48.5191	5.0922	2.8913	1.6618	58.1644
1997	48.6648	5.0833	2.8949	1.6713	58.3143
1998	48.8206	5.0771	2.8995	1.6778	58.475
1999	49.0329	5.072	2.9006	1.679	58.6845
2000	49.2333	5.0629	2.9069	1.6829	58.886
2001	49.4497	5.0642	2.9102	1.6888	59.1129
2002	49.6793	5.066	2.9229	1.6975	59.3657
2003	49.9255	5.0685	2.9377	1.7049	59.6366
2004	50.1946	5.0843	2.9574	1.714	59.9503
2005	50.606	5.1102	2.9693	1.7277	60.4132
2006	50.9652	5.1331	2.9857	1.7431	60.8271
2007	51.3811	5.17	3.0063	1.7617	61.3191
2008	51.8159	5.2029	3.0259	1.7792	61.8239
2009	52.1964	5.2319	3.0389	1.7933	62.2605
2010	52.6425	5.2622	3.05	1.8048	62.7595
2011	53.1072	5.2999	3.0638	1.8143	63.2852
2012	53.4937	5.3136	3.0741	1.8236	63.705
2013	53.8658	5.3277	3.0824	1.8297	64.1056
2014	54.3166	5.3476	3.092	1.8405	64.5967

## Sheet: Data Sheet 9
GVAC							Year	Retail Prices Index	Base			Deflated GVAC
Year	England	Scotland	Wales	Northern Ireland			1945	26.2	100			Year	England	Scotland	Wales	Northern Ireland
1950	507.399	69.8788	29.2208	28.1799			1946	27	103.053			1950	402.844	55.4795	23.1995	22.3731
1951	569.314	77.9727	32.6225	31.3312			1947	28.9	110.305			1951	414.334	56.7468	23.7419	22.8021
1952	623.361	84.9033	35.5409	33.9925			1948	31.1	118.702			1952	415.574	56.6022	23.694	22.6617
1953	671.817	90.9971	38.1121	36.299			1949	32	122.137			1953	434.608	58.8672	24.6552	23.4823
1954	713.439	96.0998	40.2708	38.193			1950	33	125.954			1954	452.594	60.9641	25.5471	24.2289
1955	776.104	103.962	43.5888	41.1633			1951	36	137.405			1955	471.785	63.197	26.4971	25.0227
1956	847.733	112.927	47.3734	44.5445			1952	39.3	150			1956	490.3	65.3131	27.3992	25.7631
1957	905.939	120.011	50.3725	47.1585			1953	40.5	154.58			1957	506.089	67.0422	28.1399	26.3444
1958	955.848	125.919	52.8814	49.2898			1954	41.3	157.634			1958	517.422	68.1628	28.6259	26.6817
1959	1004.71	131.62	55.3061	51.3211			1955	43.1	164.504			1959	541.634	70.9556	29.8152	27.6669
1960	1089.19	141.893	59.656	55.1096			1956	45.3	172.901			1960	581.199	75.715	31.8327	29.4067
1961	1166.3	151.093	63.559	58.4495			1957	46.9	179.008			1961	601.519	77.9257	32.7804	30.1452
1962	1221.68	157.385	66.243	60.6393			1958	48.4	184.733			1962	603.927	77.8014	32.7466	29.9764
1963	1307.42	167.489	70.5359	64.2709			1959	48.6	185.496			1963	634.34	81.2633	34.223	31.1833
1964	1426.93	181.778	76.5968	69.4679			1960	49.1	187.405			1964	669.99	85.3508	35.9648	32.6176
1965	1542.07	195.348	82.362	74.3447			1961	50.8	193.893			1965	691.821	87.6389	36.9501	33.3533
1966	1649.81	207.825	87.6731	78.7621			1962	53	202.29			1966	712.108	89.7038	37.8424	33.9962
1967	1764.13	220.982	93.2772	83.3937			1963	54	206.107			1967	741.899	92.9329	39.2273	35.0709
1968	1936.08	241.159	101.853	90.6187			1964	55.8	212.977			1968	777.993	96.9075	40.9288	36.4143
1969	2096.82	259.714	109.754	97.1688			1965	58.4	222.901			1969	799.659	99.0468	41.8569	37.0571
1970	2375.48	292.576	123.715	108.985			1966	60.7	231.679			1970	851.405	104.863	44.3409	39.0615
1971	2687.07	329.089	139.237	122.044			1967	62.3	237.786			1971	880.015	107.777	45.6	39.9693
1972	3040.64	370.293	156.763	136.71			1968	65.2	248.855			1972	929.577	113.205	47.9253	41.7946
1973	3555.51	430.552	182.383	158.238			1969	68.7	262.214			1973	996.304	120.647	51.1064	44.3404
1974	4074.64	490.628	207.957	179.492			1970	73.1	279.008			1974	983.922	118.474	50.2165	43.3427
1975	5078.37	608.03	257.876	221.412			1971	80	305.344			1975	987.042	118.178	50.1213	43.0342
1976	6012.46	715.793	303.766	259.434			1972	85.7	327.099			1976	1002.72	119.375	50.6599	43.2664
1977	7002.42	828.923	351.992	299.013			1973	93.5	356.87			1977	1008.04	119.329	50.6714	43.0448
1978	8209.82	966.335	410.597	346.911			1974	108.5	414.122			1978	1091.31	128.452	54.5796	46.1139
1979	9703.39	1135.64	482.838	405.715			1975	134.8	514.504			1979	1137.49	133.127	56.6011	47.5603
1980	11359.3	1321.88	562.371	469.93			1976	157.1	599.618			1980	1128.6	131.336	55.8745	46.6901
1981	12740	1474.11	627.53	521.446			1977	182	694.656			1981	1131.49	130.921	55.7332	46.3115
1982	13957	1605.71	683.989	565.144			1978	197.1	752.29			1982	1141.3	131.304	55.9317	46.2134
1983	15417.8	1763.64	751.742	617.57			1979	223.5	853.053			1983	1205.45	137.891	58.7754	48.2851
1984	16577.4	1885.44	804.176	656.82			1980	263.7	1006.49			1984	1234.59	140.417	59.8903	48.9161
1985	18237.6	2062.38	880.213	714.713			1981	295	1125.95			1985	1280.34	144.786	61.7942	50.1755
1986	19596.8	2203.37	941.002	759.545			1982	320.4	1222.9			1986	1330.49	149.594	63.8877	51.568
1987	21816.7	2438.88	1042.26	836.235			1983	335.1	1279.01			1987	1421.88	158.952	67.9286	54.5009
1988	24492.1	2722.21	1164.12	928.333			1984	351.8	1342.75			1988	1521.68	169.13	72.326	57.6769
1989	27242.9	3010.52	1288.27	1021.03			1985	373.2	1424.43			1989	1570.44	173.544	74.2631	58.8579
1990	29799.3	3274.02	1401.96	1104.23			1986	385.9	1472.9			1990	1569.33	172.421	73.8319	58.1524
1991	31341.5	3423.57	1466.99	1148.18			1987	402	1534.35			1991	1559.04	170.301	72.9732	57.1145
1992	32538.4	3533.76	1515.23	1178.38			1988	421.7	1609.54			1992	1560.23	169.444	72.6555	56.5036
1993	34389	3713.1	1593.21	1231.04			1989	454.5	1734.73			1993	1623.12	175.254	75.1977	58.1036
1994	36173.1	3883.07	1667.29	1279.87			1990	497.5	1898.85			1994	1667.08	178.956	76.839	58.9842
1995	37936.2	4048.67	1739.6	1326.54			1991	526.7	2010.31			1995	1689.78	180.339	77.4863	59.0878
1996	40649.6	4312.99	1854.46	1404.67			1992	546.4	2085.5			1996	1767.96	187.584	80.6555	61.0928
1997	38156.3	4024.86	1731.78	1302.85			1993	555.1	2118.7			1997	1609.04	169.727	73.0287	54.9407
1998	41283.4	4329.28	1864.09	1392.75			1994	568.5	2169.85			1998	1683.2	176.513	76.0023	56.785
1999	42756	4457.49	1920.65	1425.03			1995	588.2	2245.04			1999	1716.79	178.983	77.1205	57.2196
2000	48668	5044.12	2174.98	1602.35			1996	602.4	2299.24			2000	1898.04	196.719	84.8234	62.4911
2001	50369.2	5189.81	2239.41	1638.03			1997	621.3	2371.37			2001	1930.19	198.878	85.8162	62.7709
2002	57503.1	5890.04	2543.4	1846.93			1998	642.6	2452.67			2002	2167.43	222.01	95.867	69.6151
2003	60364.1	6146.68	2656.16	1914.66			1999	652.5	2490.46			2003	2211.32	225.172	97.3036	70.1399
2004	62939.4	6371.13	2755.18	1971.27			2000	671.8	2564.12			2004	2238.99	226.644	98.0119	70.1252
2005	69778	7021.65	3038.75	2157.76			2001	683.7	2609.54			2005	2414.08	242.925	105.13	74.6512
2006	75066.9	7509.17	3252.15	2291.65			2002	695.1	2653.05			2006	2516.64	251.747	109.029	76.8282
2007	80617.3	8016.59	3474.52	2429.37			2003	715.2	2729.77			2007	2591.62	257.711	111.696	78.0975
2008	76227.9	7535.09	3268.3	2267.23			2004	736.5	2811.07			2008	2356.54	232.943	101.038	70.09
2009	65993.2	6484.59	2814.8	1937.07			2005	757.3	2890.46			2009	2051.03	201.538	87.4824	60.203
2010	69126.8	6752.02	2933.13	2002.18			2006	781.5	2982.82			2010	2053.66	200.593	87.139	59.4819
2011	73213	7108.46	3090.35	2092.2			2007	815	3110.69			2011	2067.45	200.735	87.2679	59.0813
2012	74878.2	7226.64	3144.17	2110.93			2008	847.5	3234.73			2012	2048.67	197.721	86.0248	57.7551
2013	78421.2	7523.23	3275.78	2180.71			2009	843	3217.56			2013	2082.33	199.765	86.9822	57.9047
2014	83835.9	7994.39	3483.68	2299.23			2010	881.9	3366.03			2014	2174.75	207.379	90.3687	59.6435
							2011	927.8	3541.22
							2012	957.6	3654.96
							2013	986.7	3766.03
							2014	1010	3854.96
							2015	1020	3893.13
							2016	1037.7	3960.69
							2017	1074.9	4102.67

[truncated: 23 more sheets: Data Sheet 10, Data Sheet 11, Data Sheet 12, Data Sheet 13, Data Sheet 14, Data Sheet 15, Data Sheet 16, Data Sheet 17, Data Sheet 18, Data Sheet 19, Data Sheet 20, Data Sheet 21, Data Sheet 22, Data Sheet 23, Data Sheet 24, Data Sheet 25, Data Sheet 26, Data Sheet 27, Data Sheet 28, Data Sheet 29 …]
